# Supplementary material for: Aminooxy Click Modification of a Periodate-Oxidized Immunoglobulin G: A General Approach to Antibody–Drug Conjugates with Dye-Mediated Expeditious Stoichiometry Control
Source: MDPI journal article supplement (doi:10.3390/ijms24065134), 2023-03-07

## Supporting Information

### Aminooxy click modification of a periodate-oxidized immunoglobulin G: a general approach to antibody-drug conjugates with dye-mediated expeditious stoichiometry control

Ksenia A. Sapozhnikova <sup>1,†</sup>, Evgeny L. Gulyak <sup>1,†</sup>, Vladimir A. Brylev <sup>1,2</sup>, Vsevolod A. Misyurin <sup>3</sup>, Sergey D. Oreshkov <sup>1,4</sup>, Anastasiya V. Alexeeva <sup>5</sup>, Dmitry Yu. Ryazantsev <sup>1</sup>, Maria A. Simonova <sup>1</sup>, Ekaterina V. Ryabukhina <sup>1</sup>, Galina P. Popova <sup>1</sup>, Nataliya A. Tikhonova <sup>5</sup>, Natalia A. Lyzhko <sup>5</sup>, Alexander E. Barmashov <sup>3</sup>, Andrey V. Misyurin <sup>5</sup>, Alexey V. Ustinov <sup>1,2</sup>, Vera A. Alferova <sup>1</sup> and Vladimir A. Korshun <sup>1,\*</sup>

<sup>1</sup> Shemyakin-Ovchinnikov Institute of Bioorganic Chemistry, Miklukho-Maklaya 16/10, 117997 Moscow, Russia;

<sup>2</sup> Lumiprobe RUS Ltd., Kotsyubinskogo 4, 121351 Moscow, Russia;

<sup>3</sup> N.N. Blokhin National Medical Cancer Research Center Ministry of Health of Russia, Kashirskoye sh. 24, 115478 Moscow, Russia;

<sup>4</sup> Department of Chemistry, Lomonosov Moscow State University, Leninskie Gory 1/3, 119991 Moscow, Russia;

<sup>5</sup> GeneTechnology LLC, Profsoyuznaya 104, 117485 Moscow, Russia

## Table of Contents

|                    |     |
|--------------------|-----|
| NMR spectra .....  | S2  |
| HRMS spectra ..... | S20 |

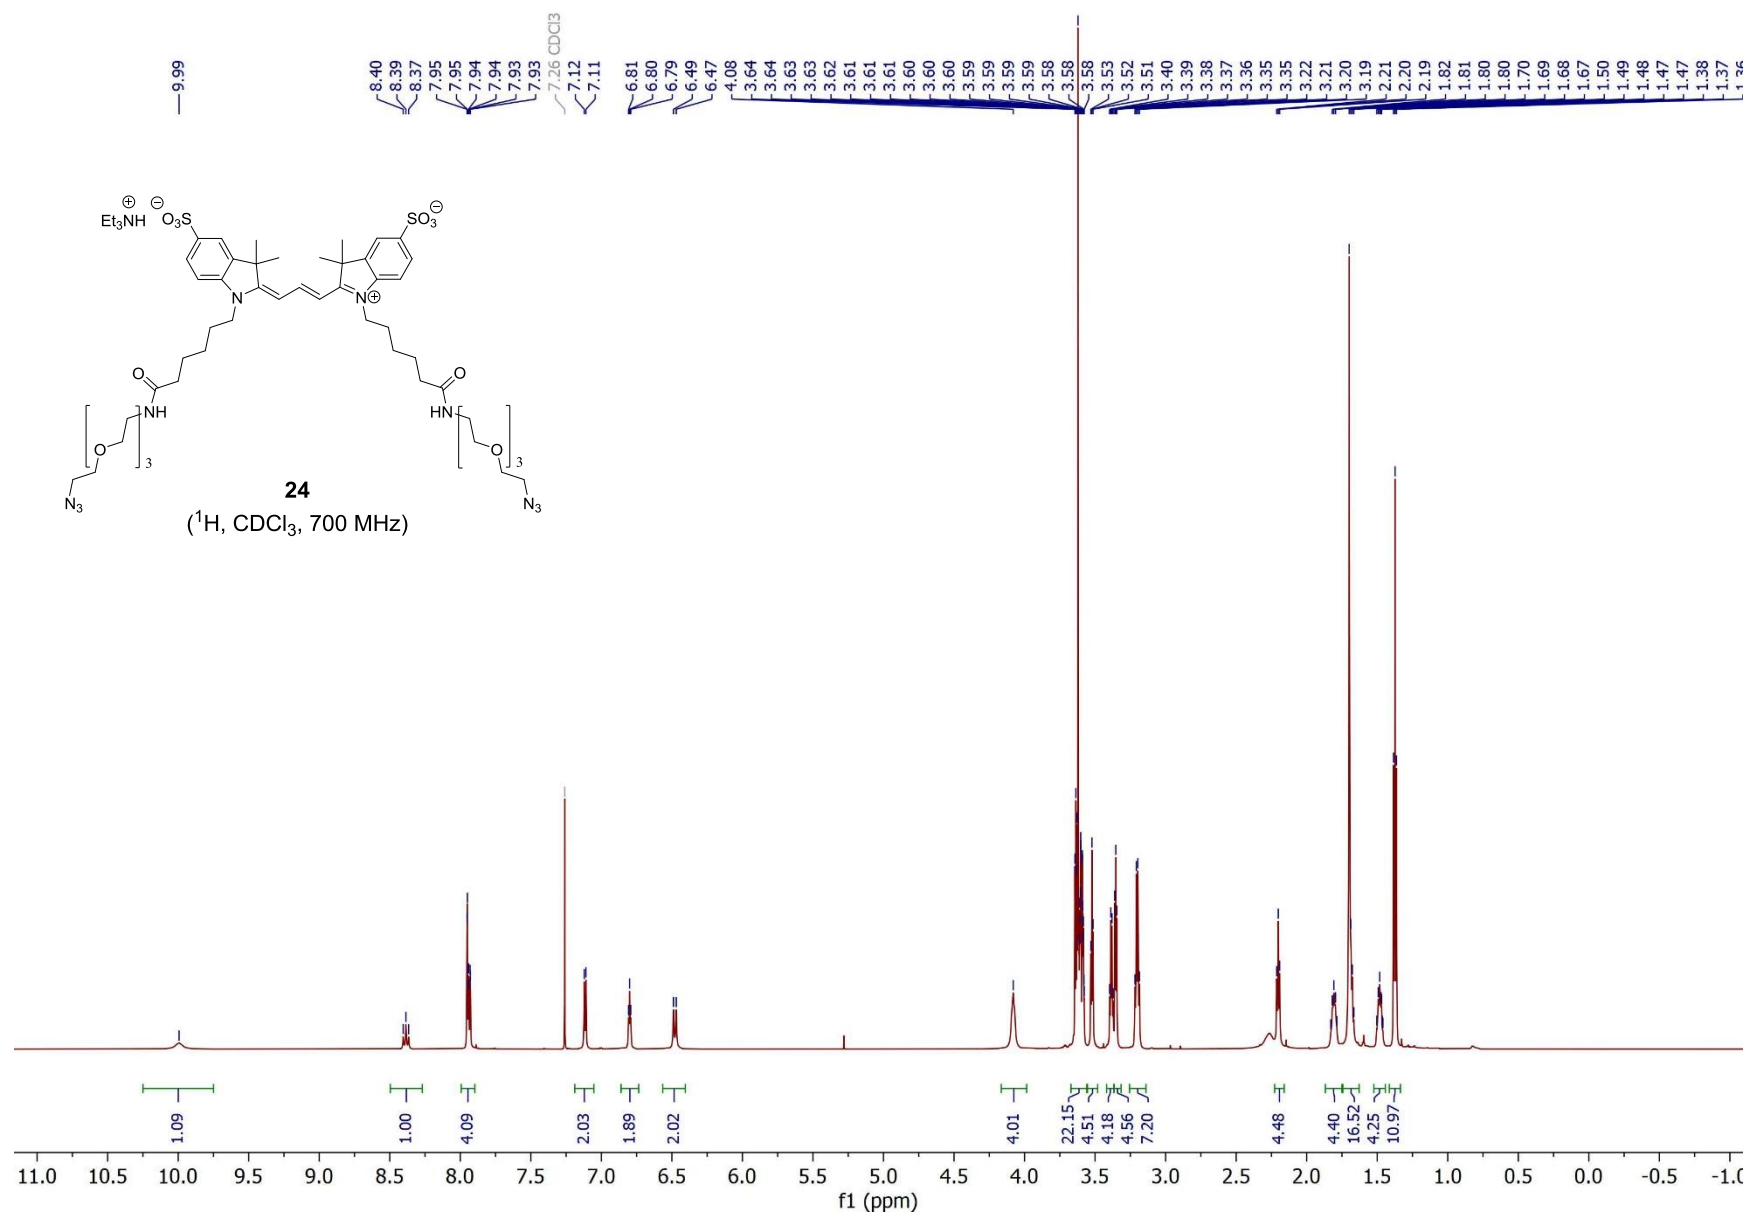

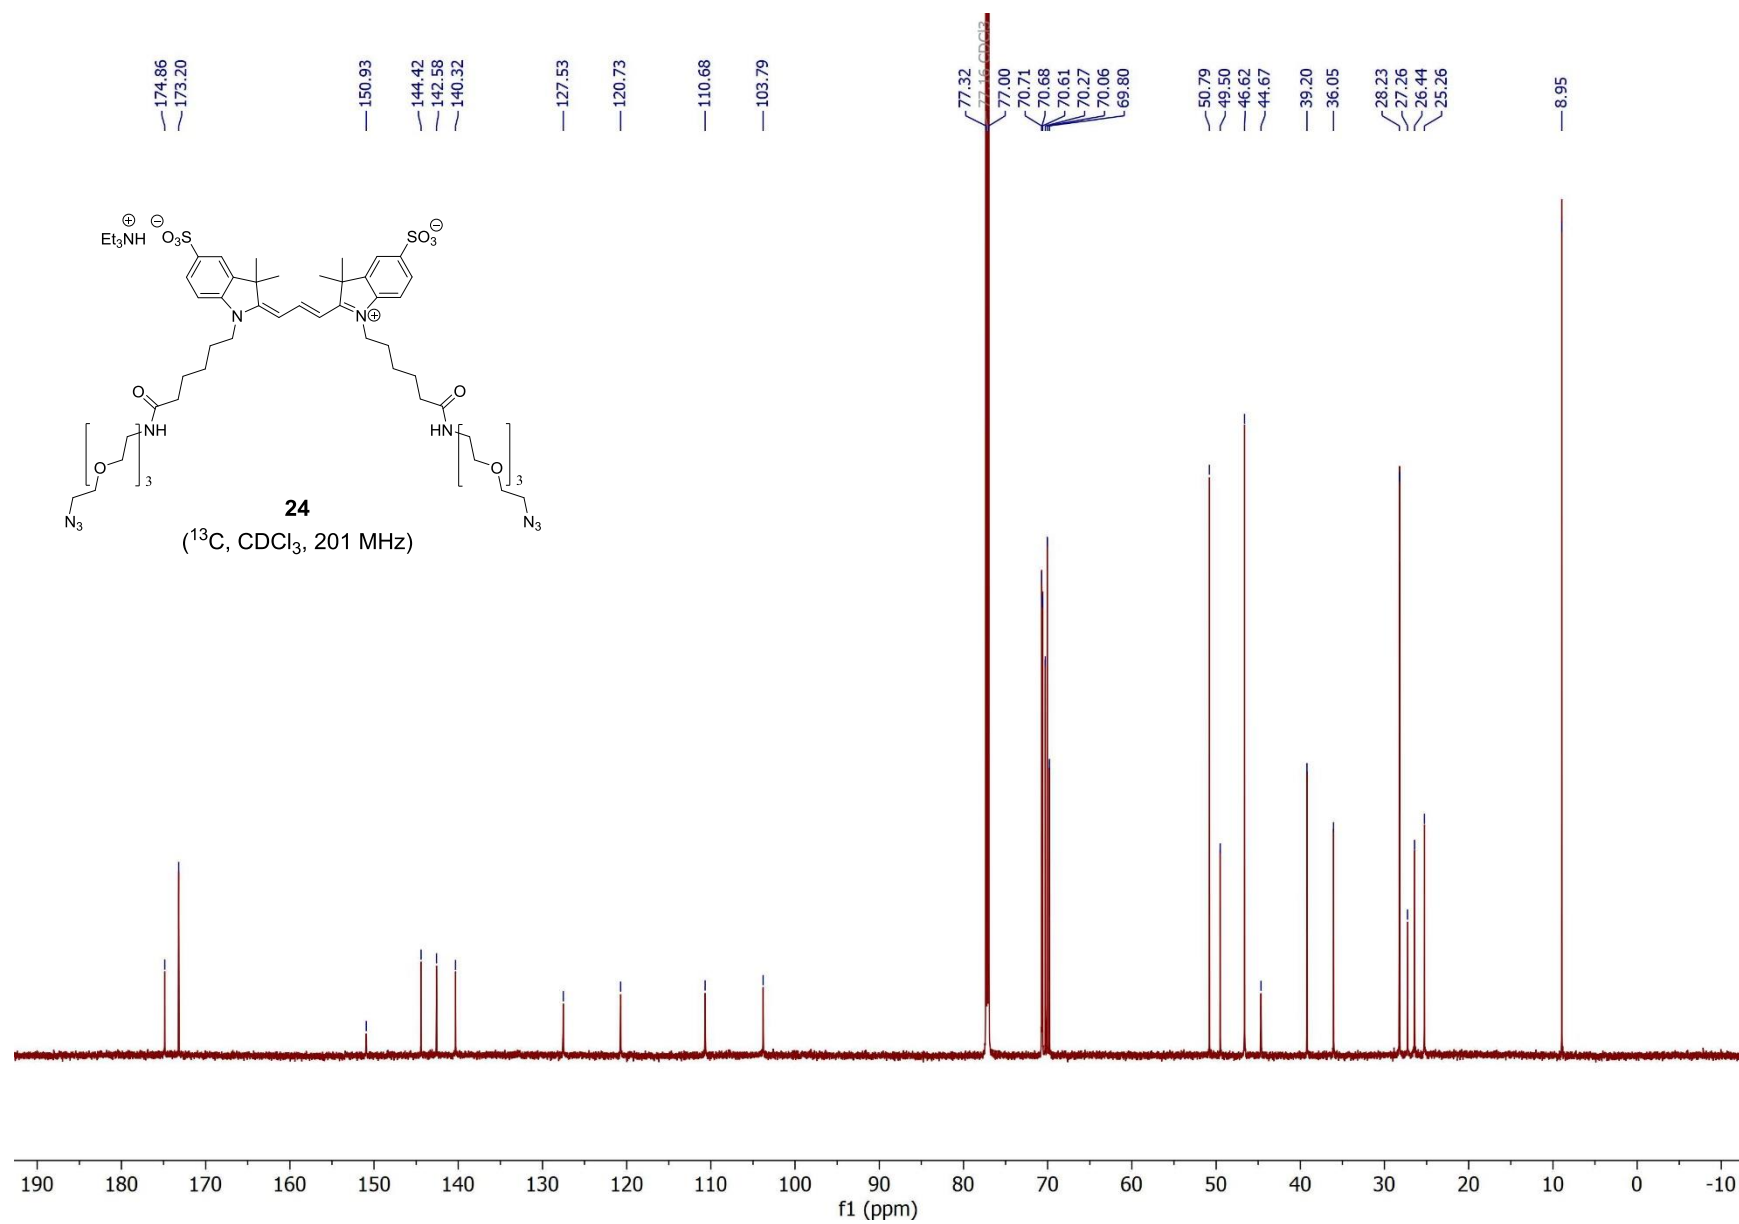

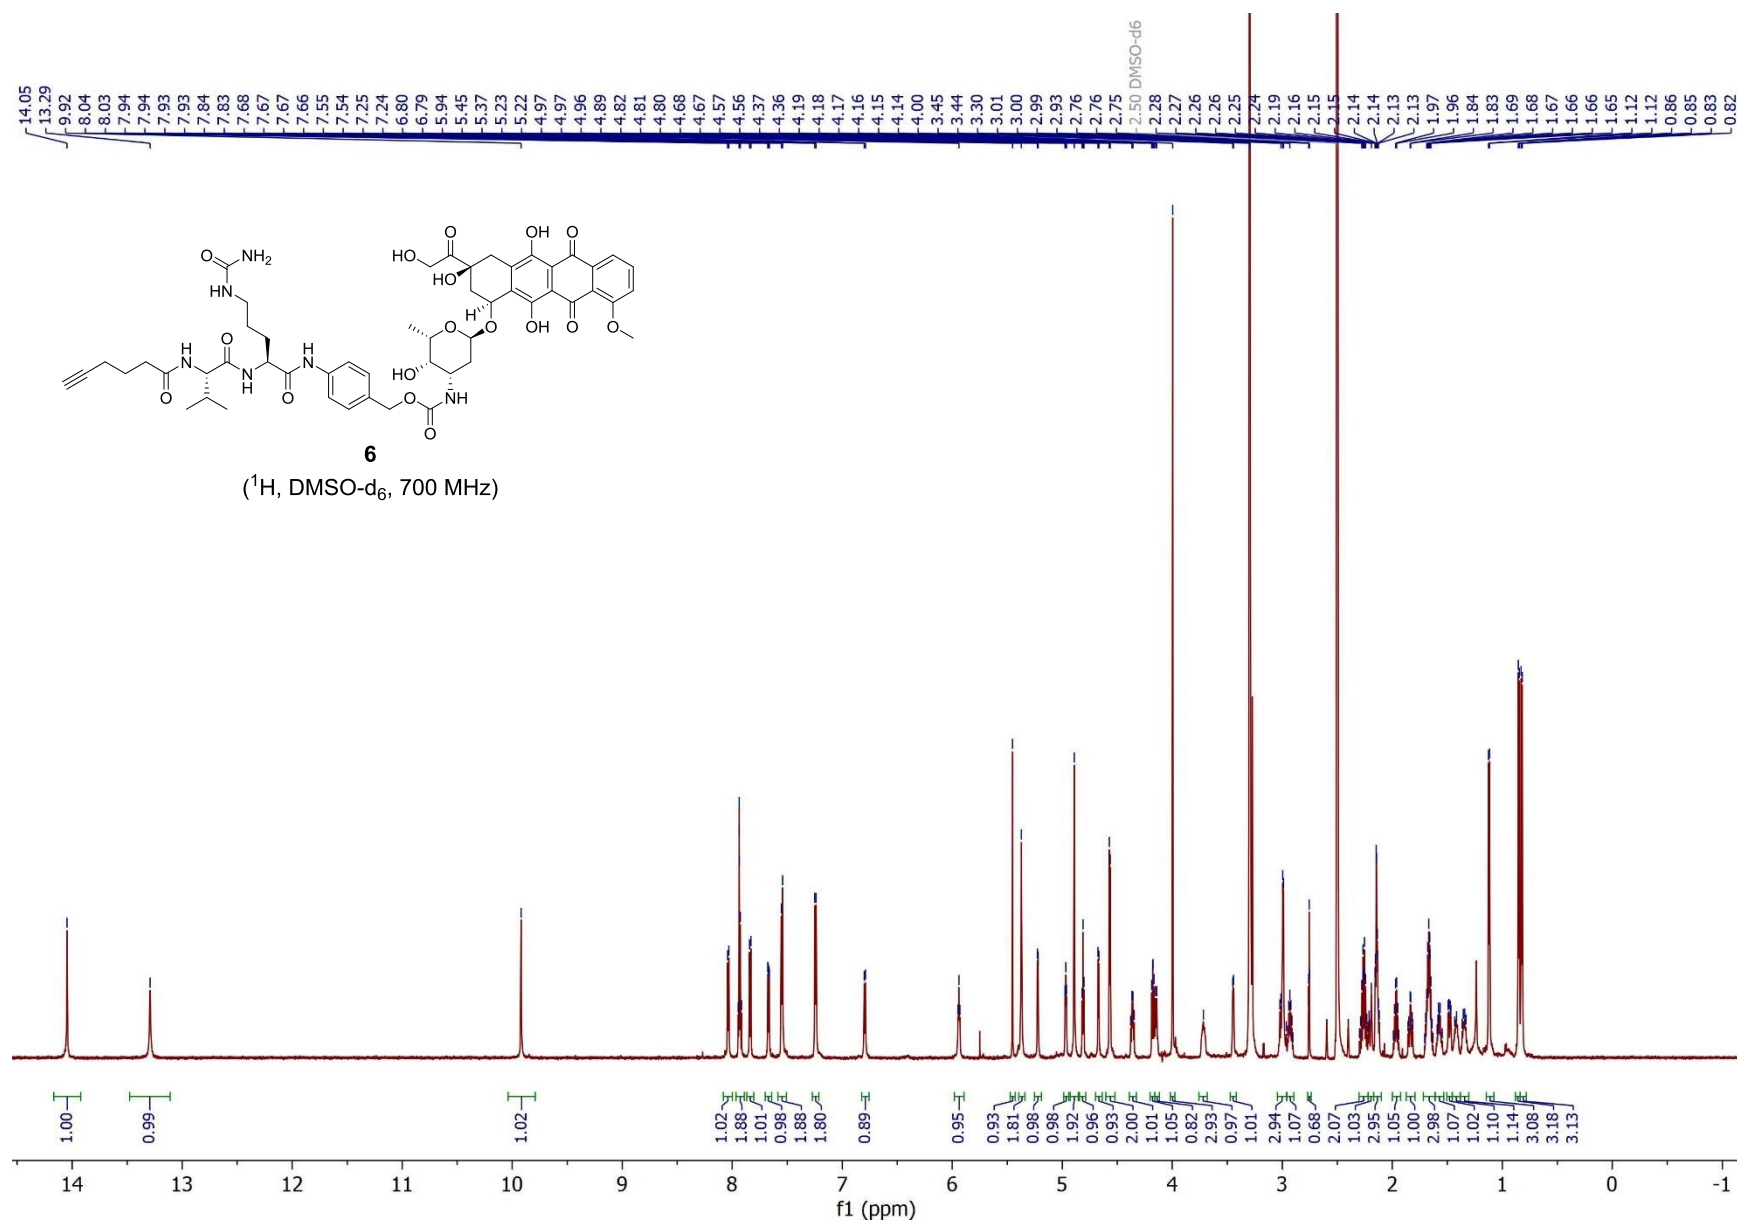

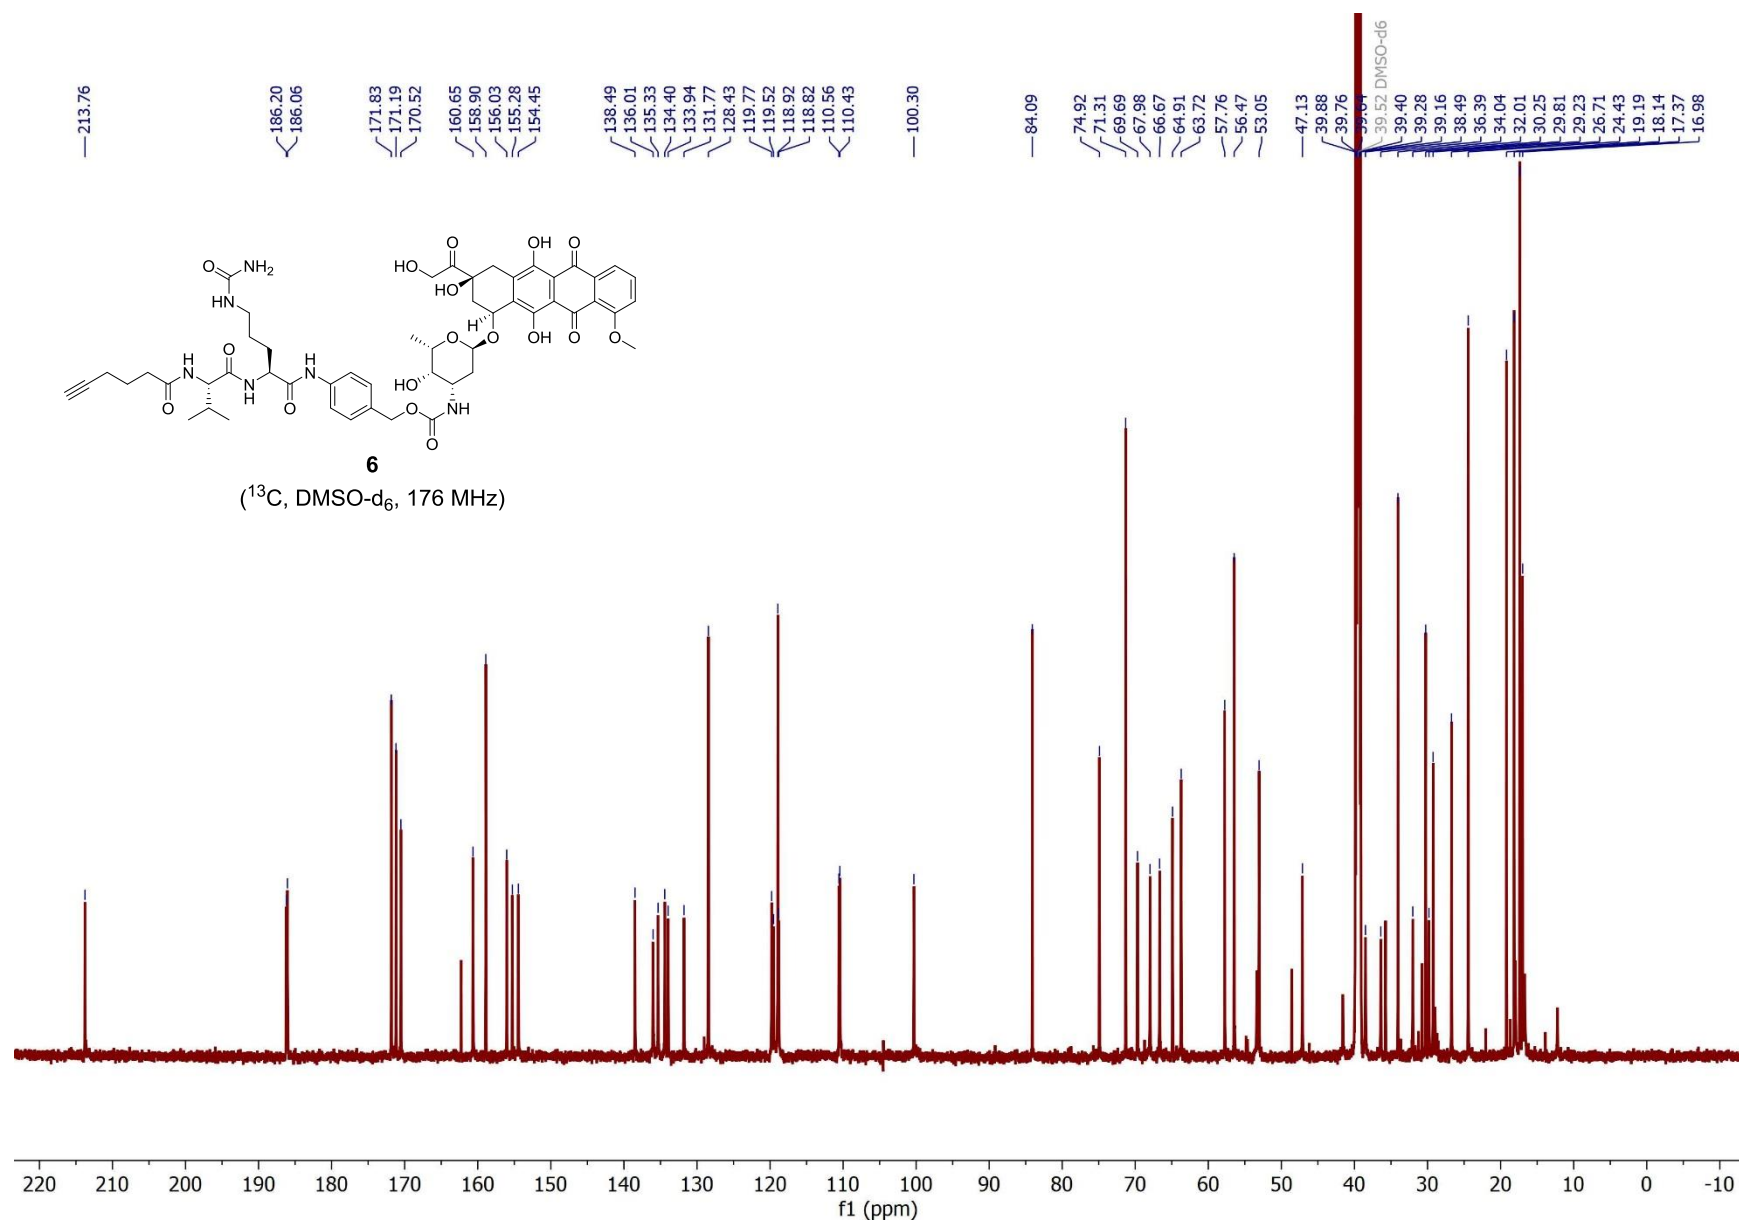

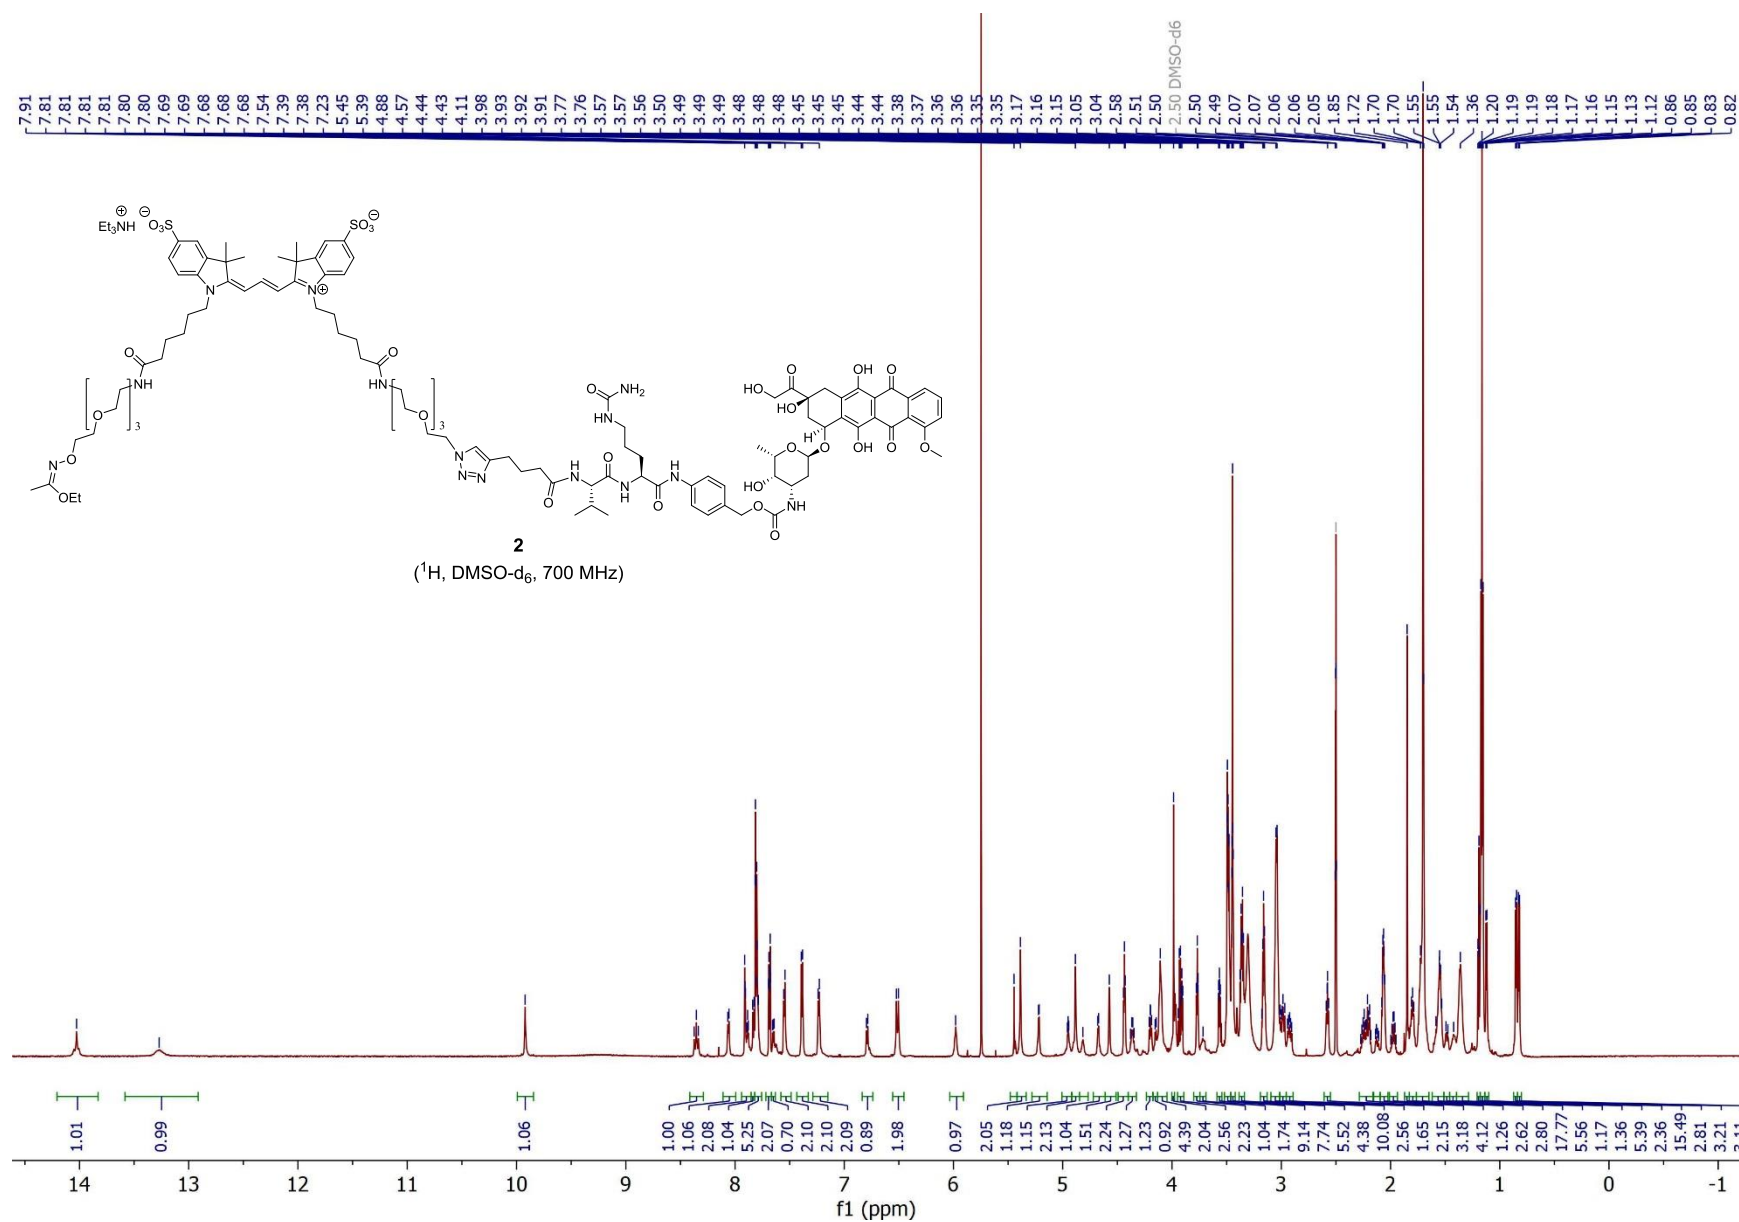

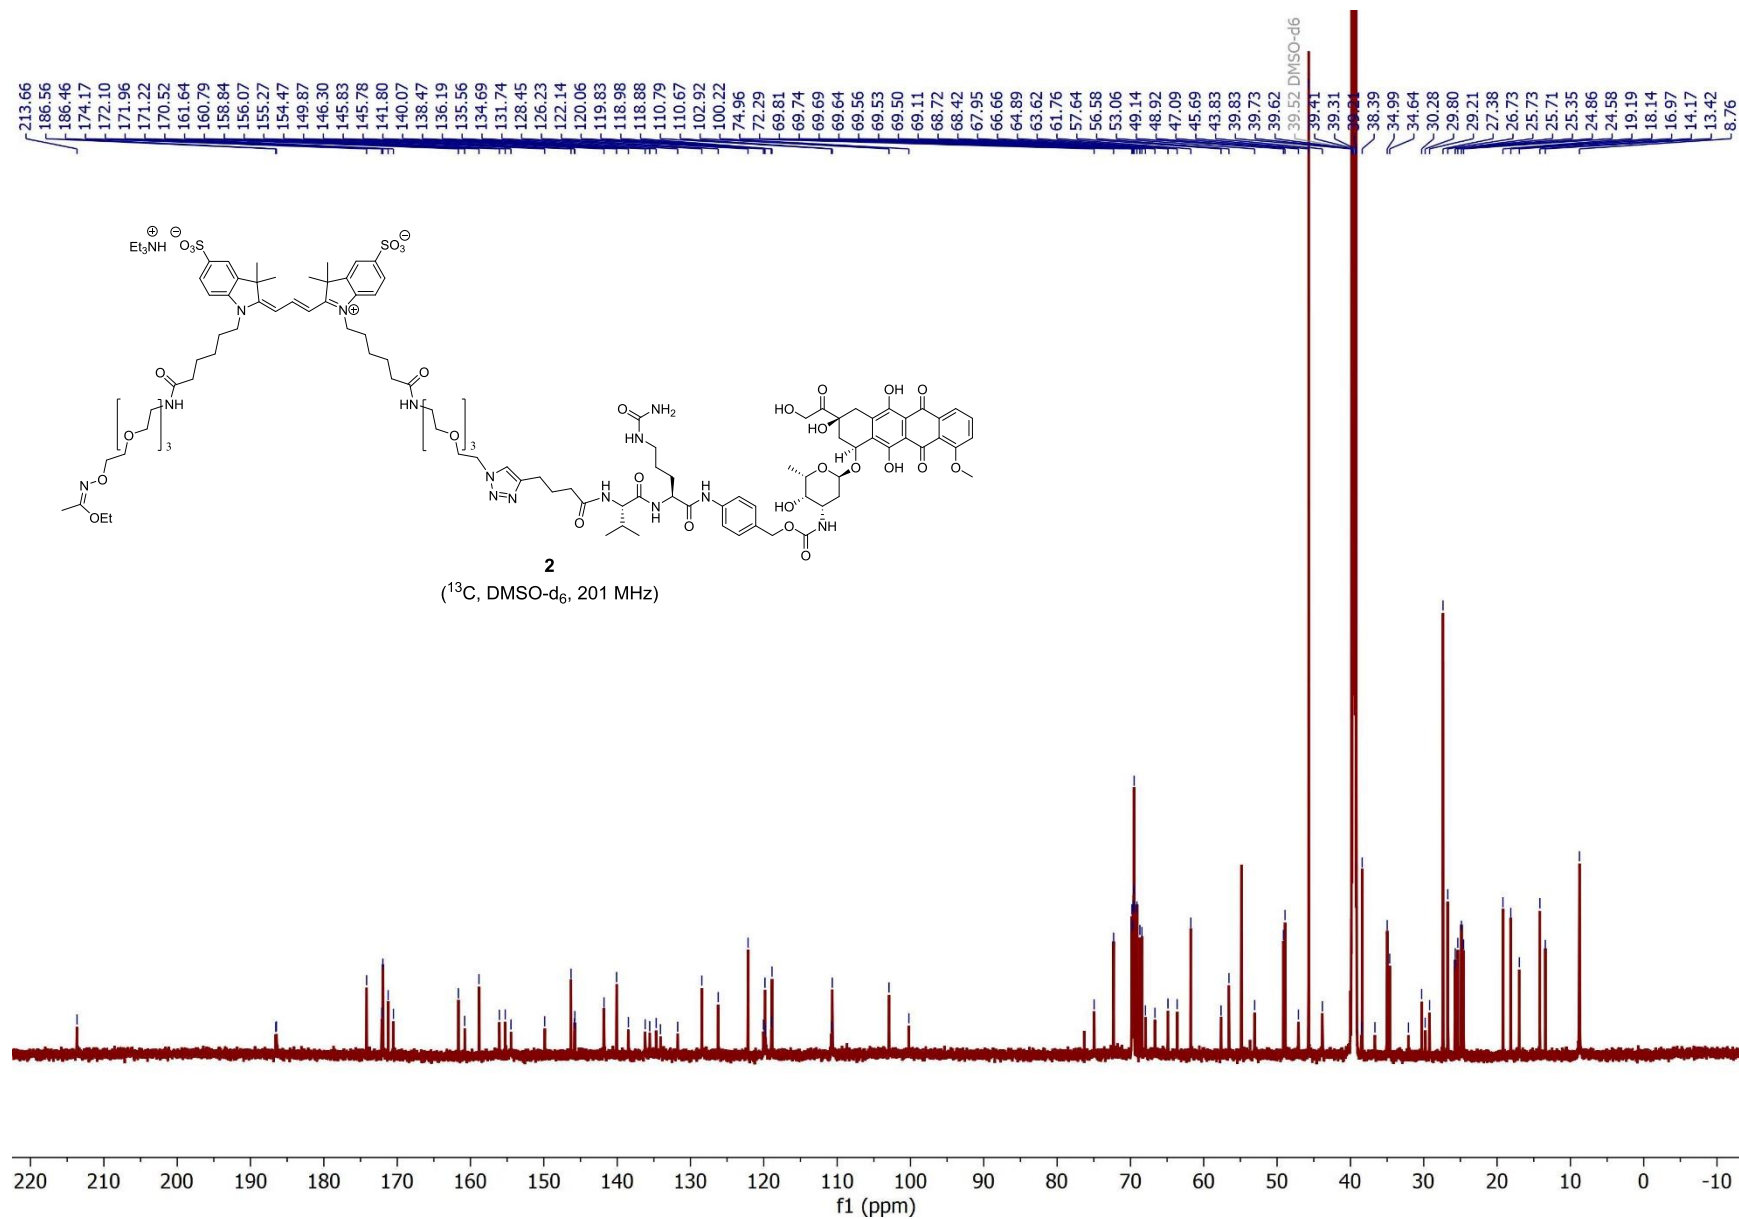

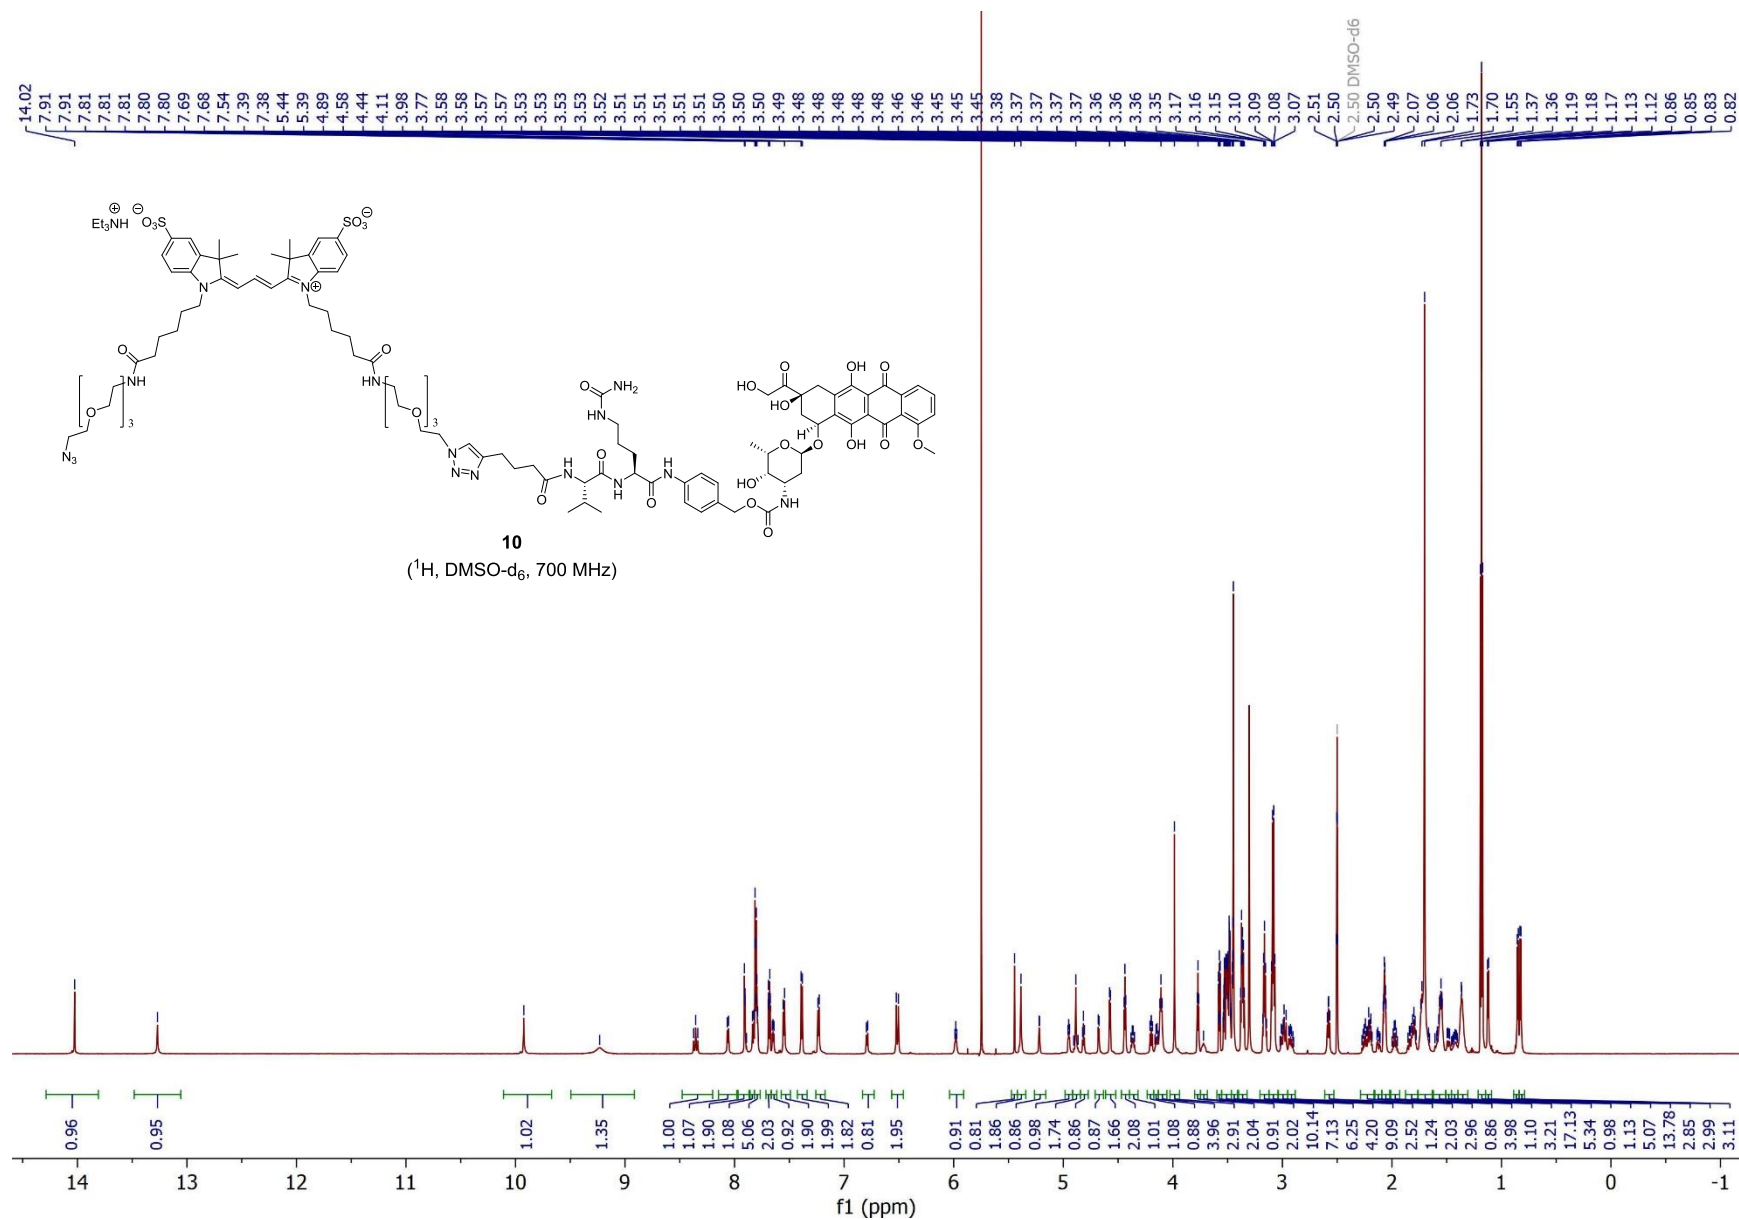



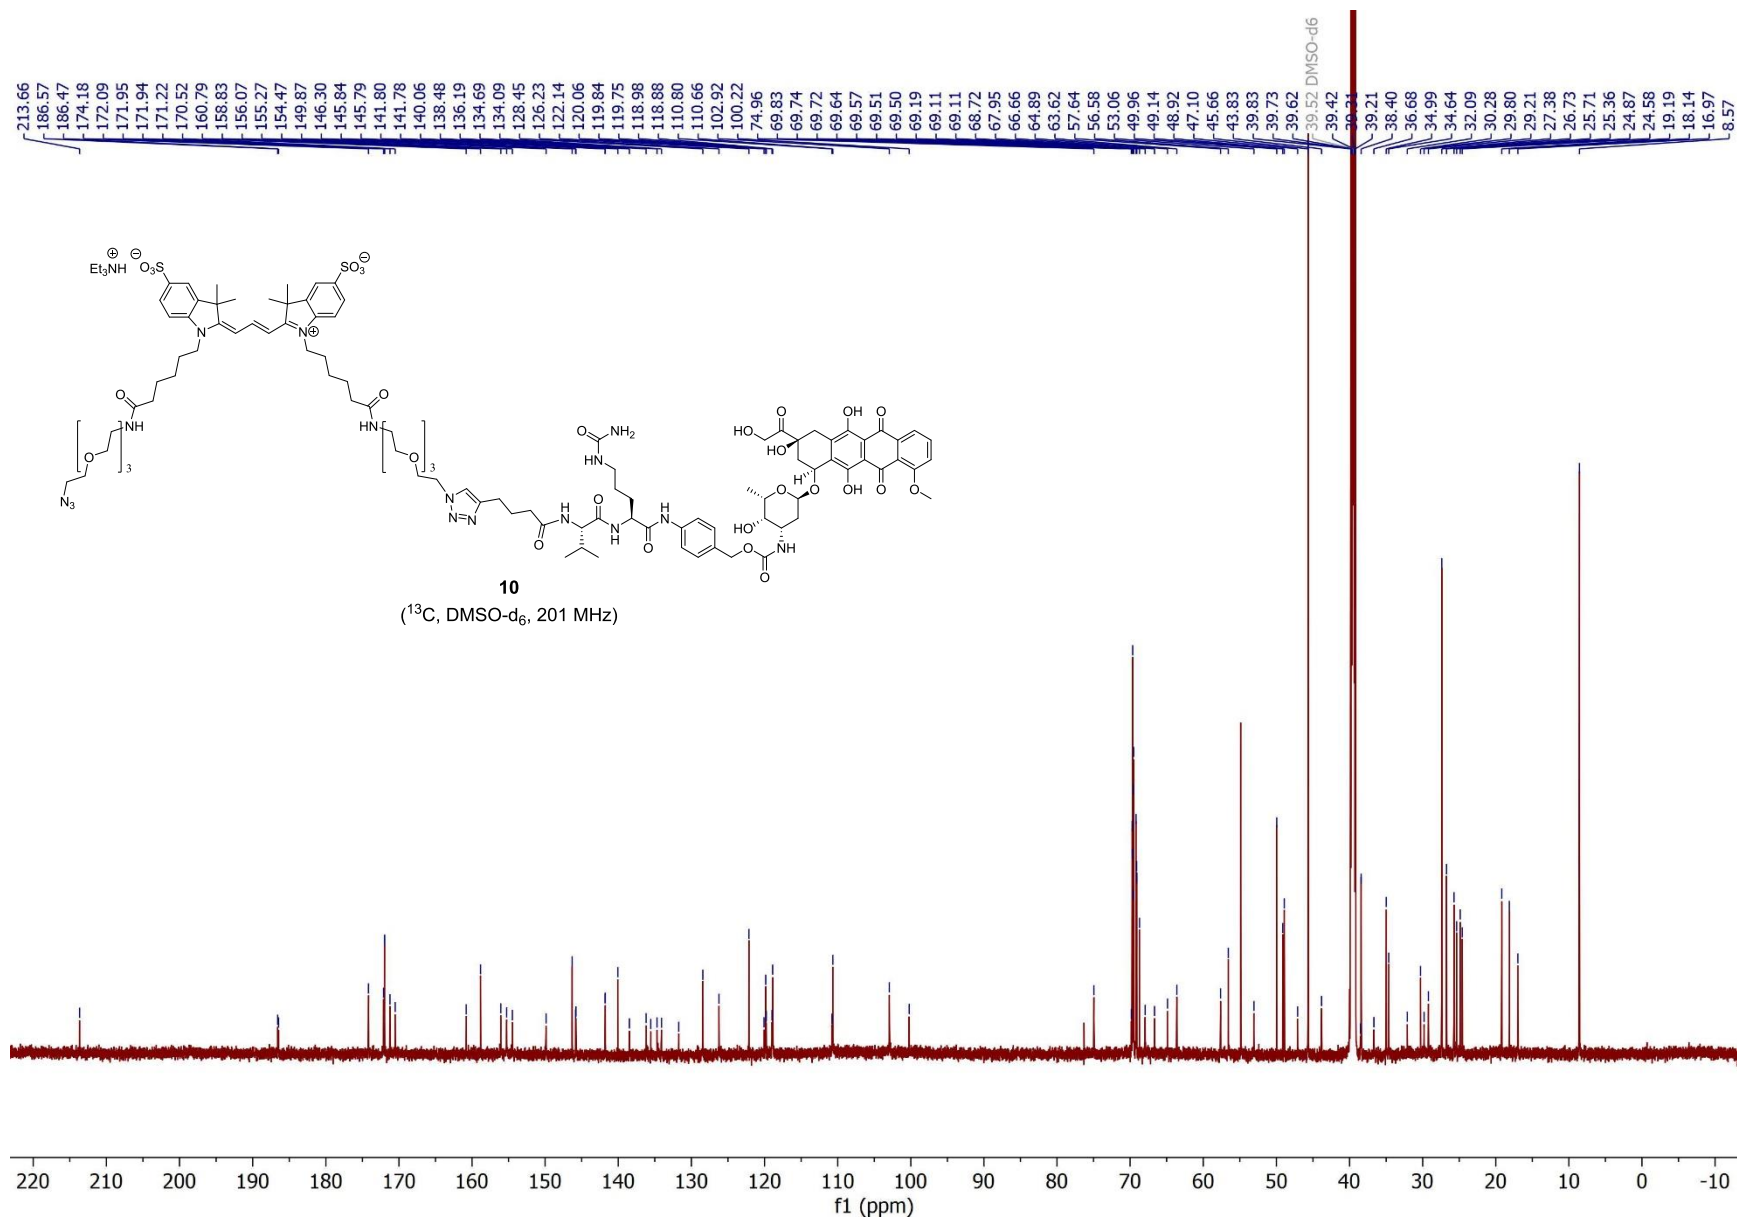

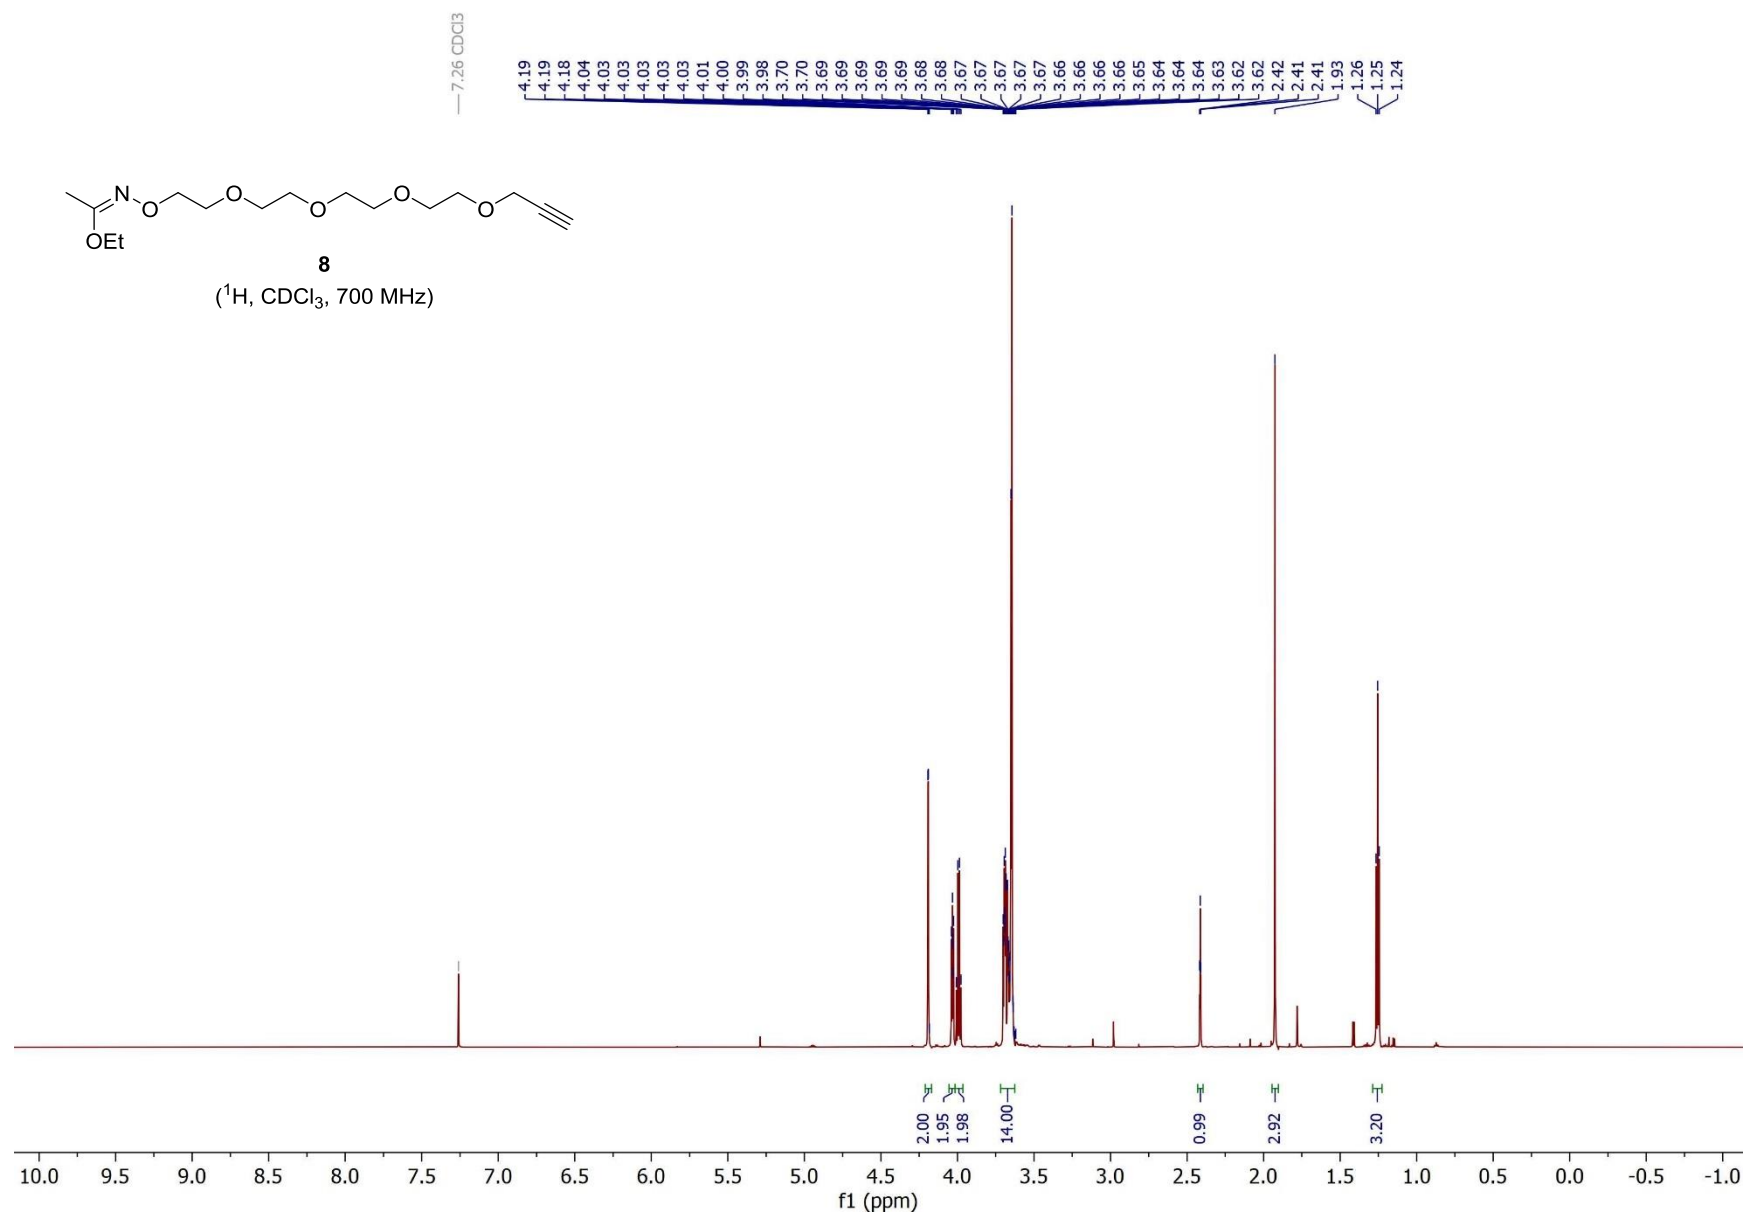

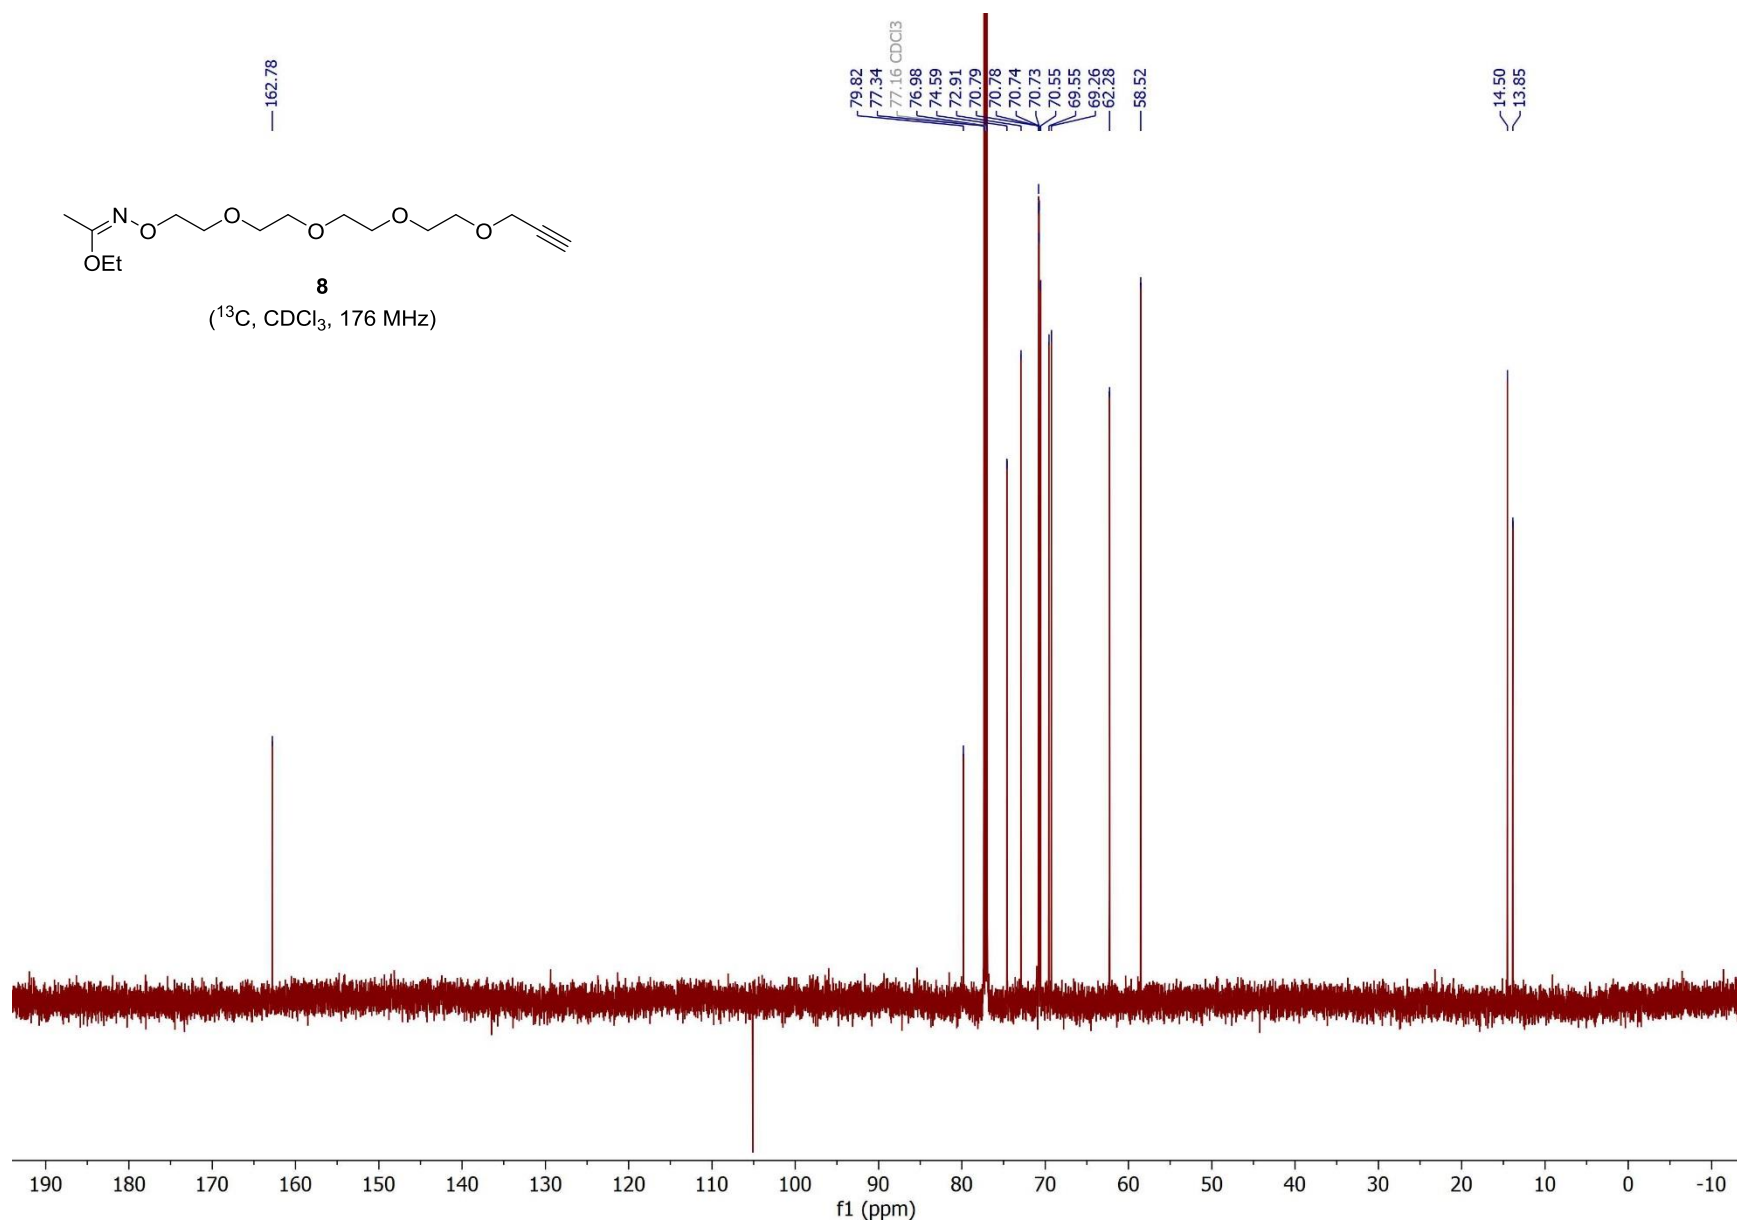

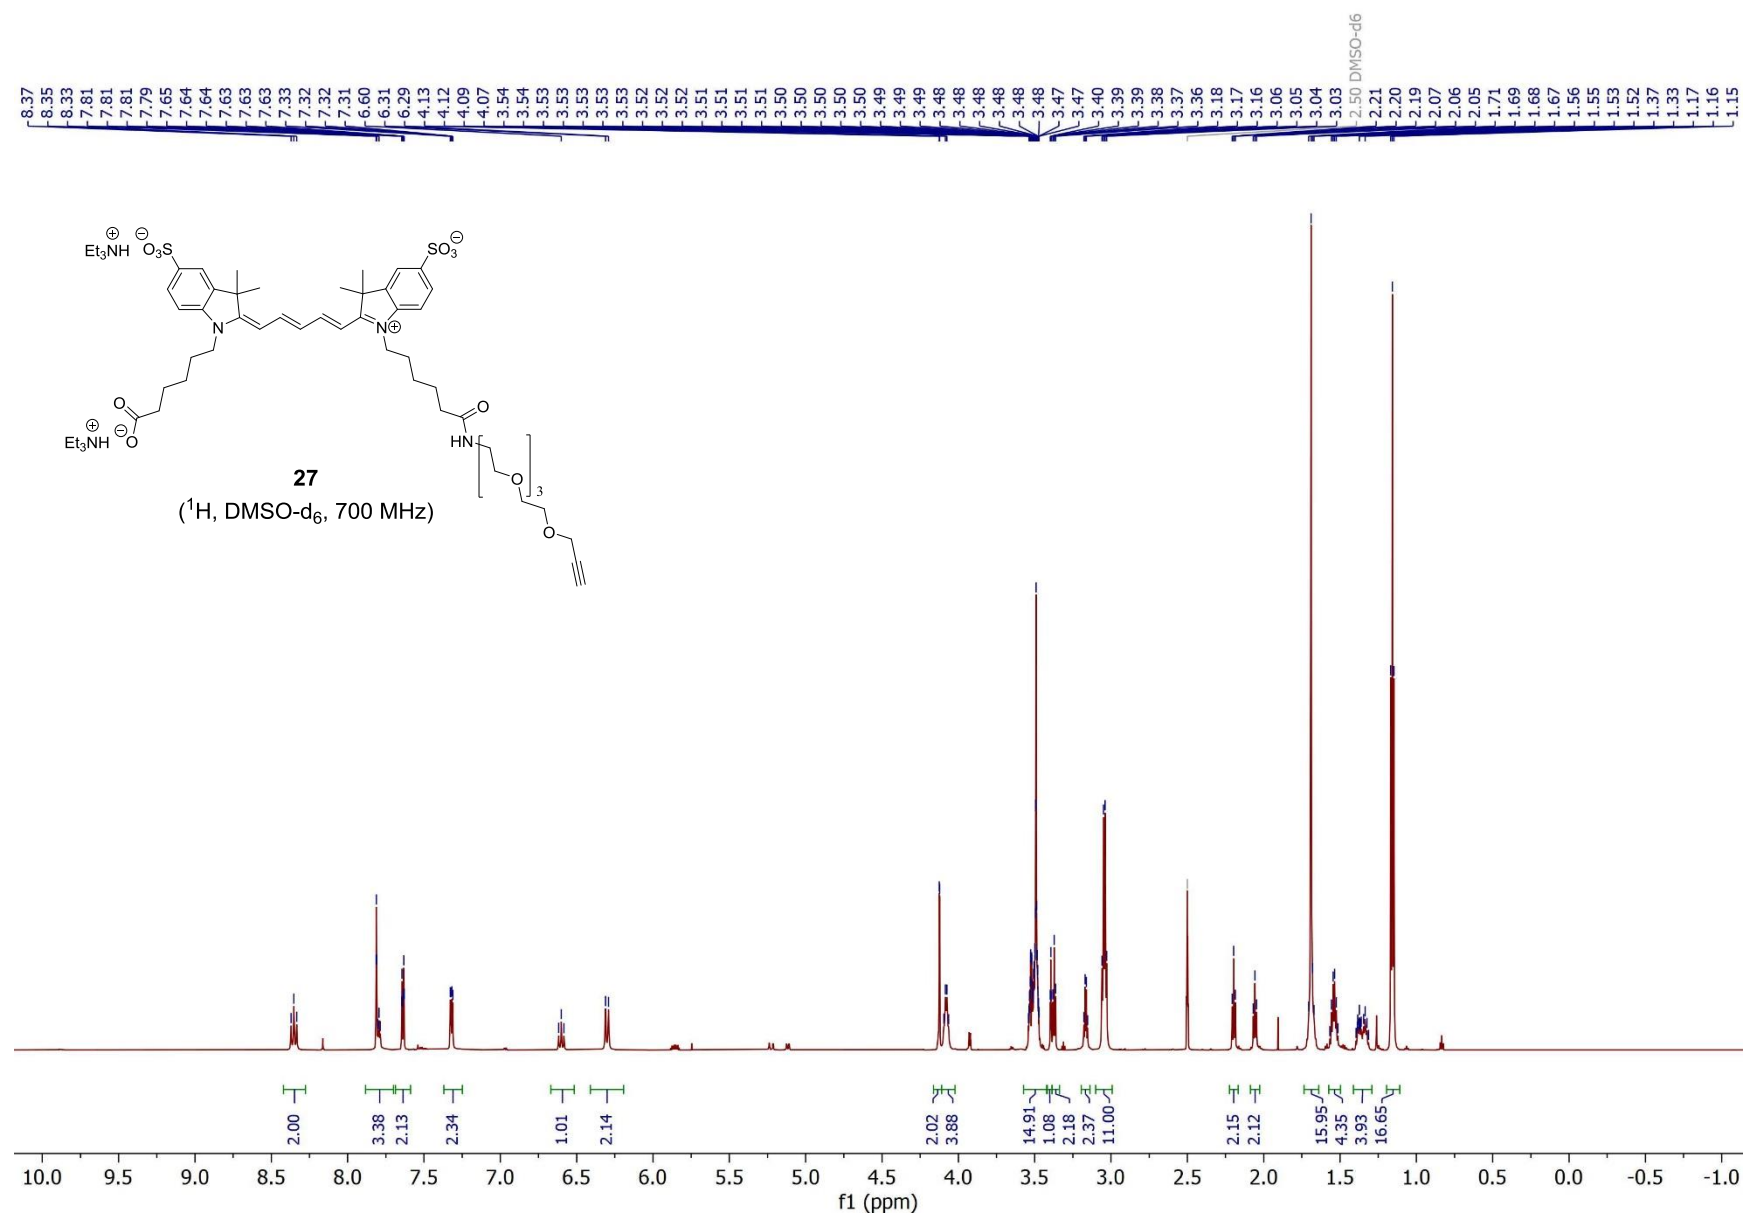

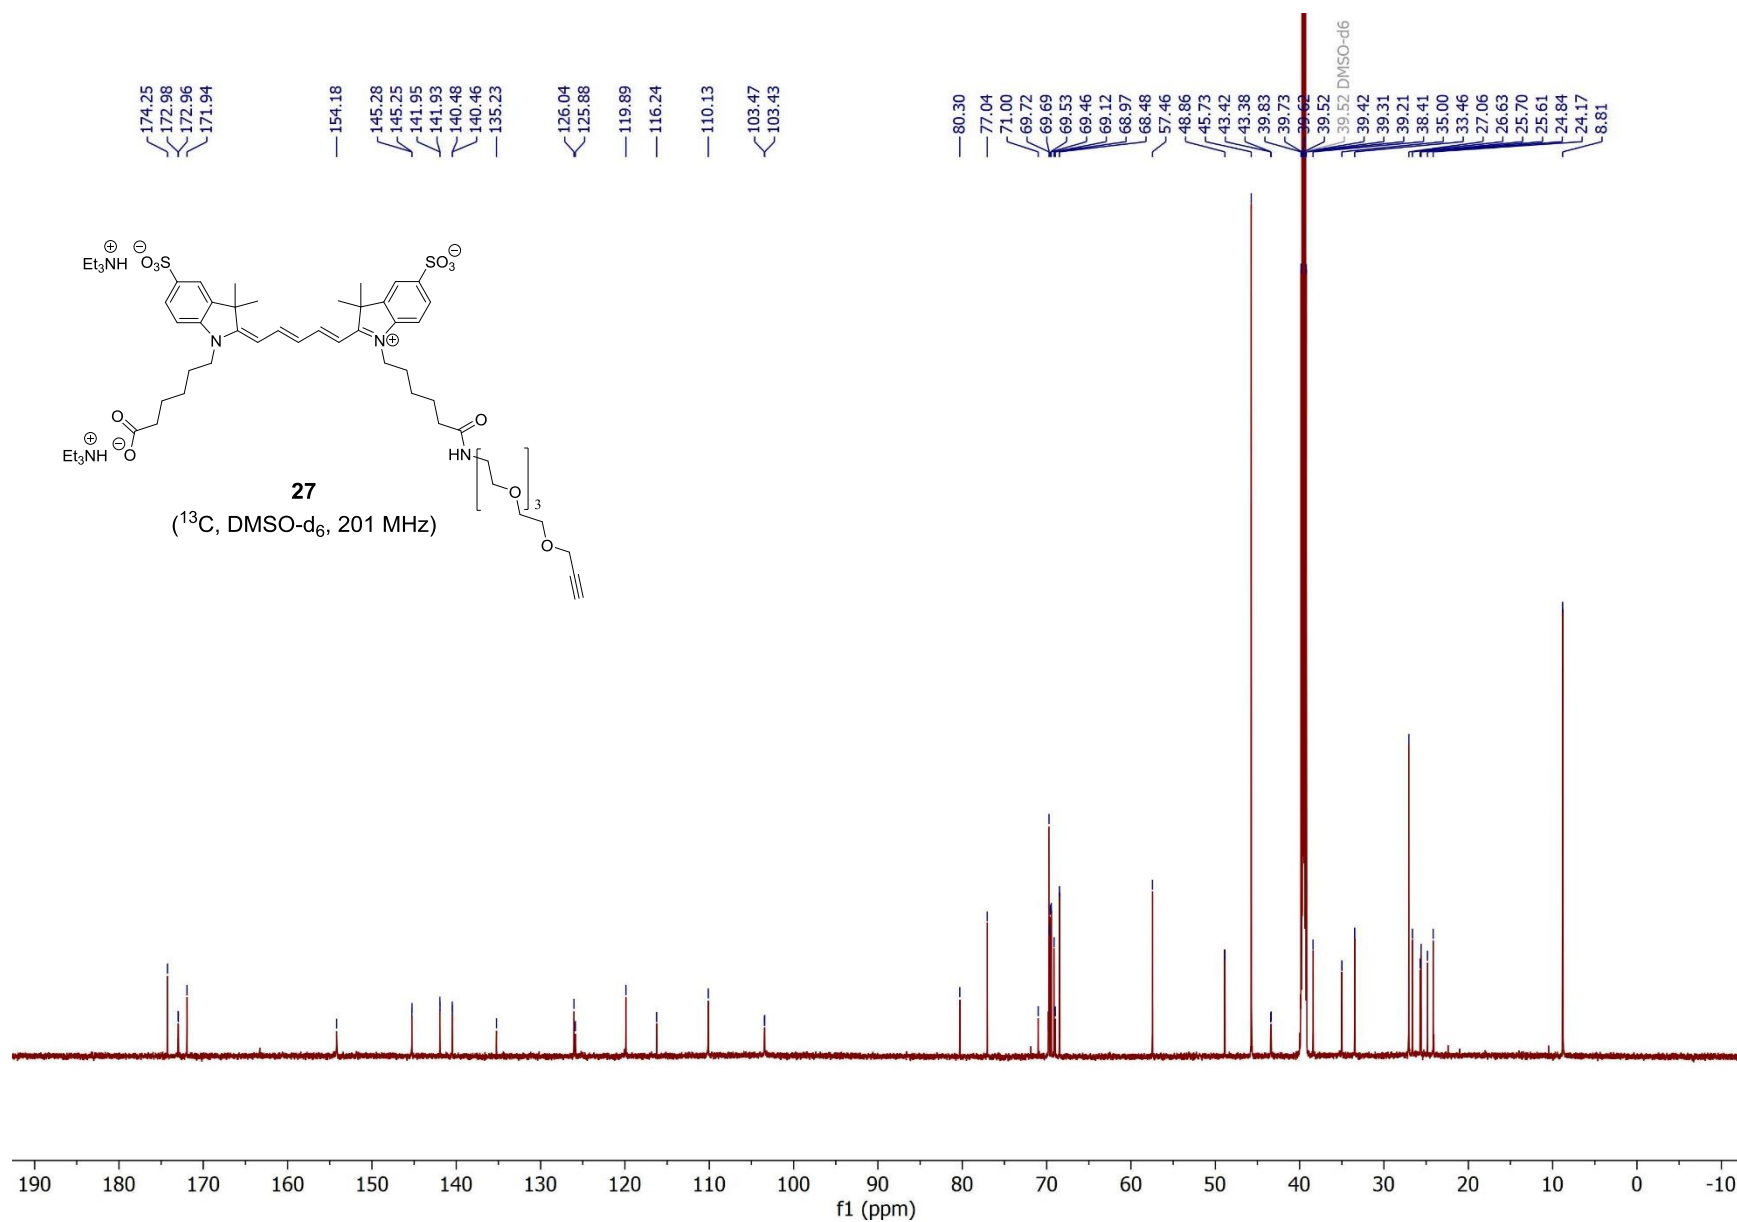

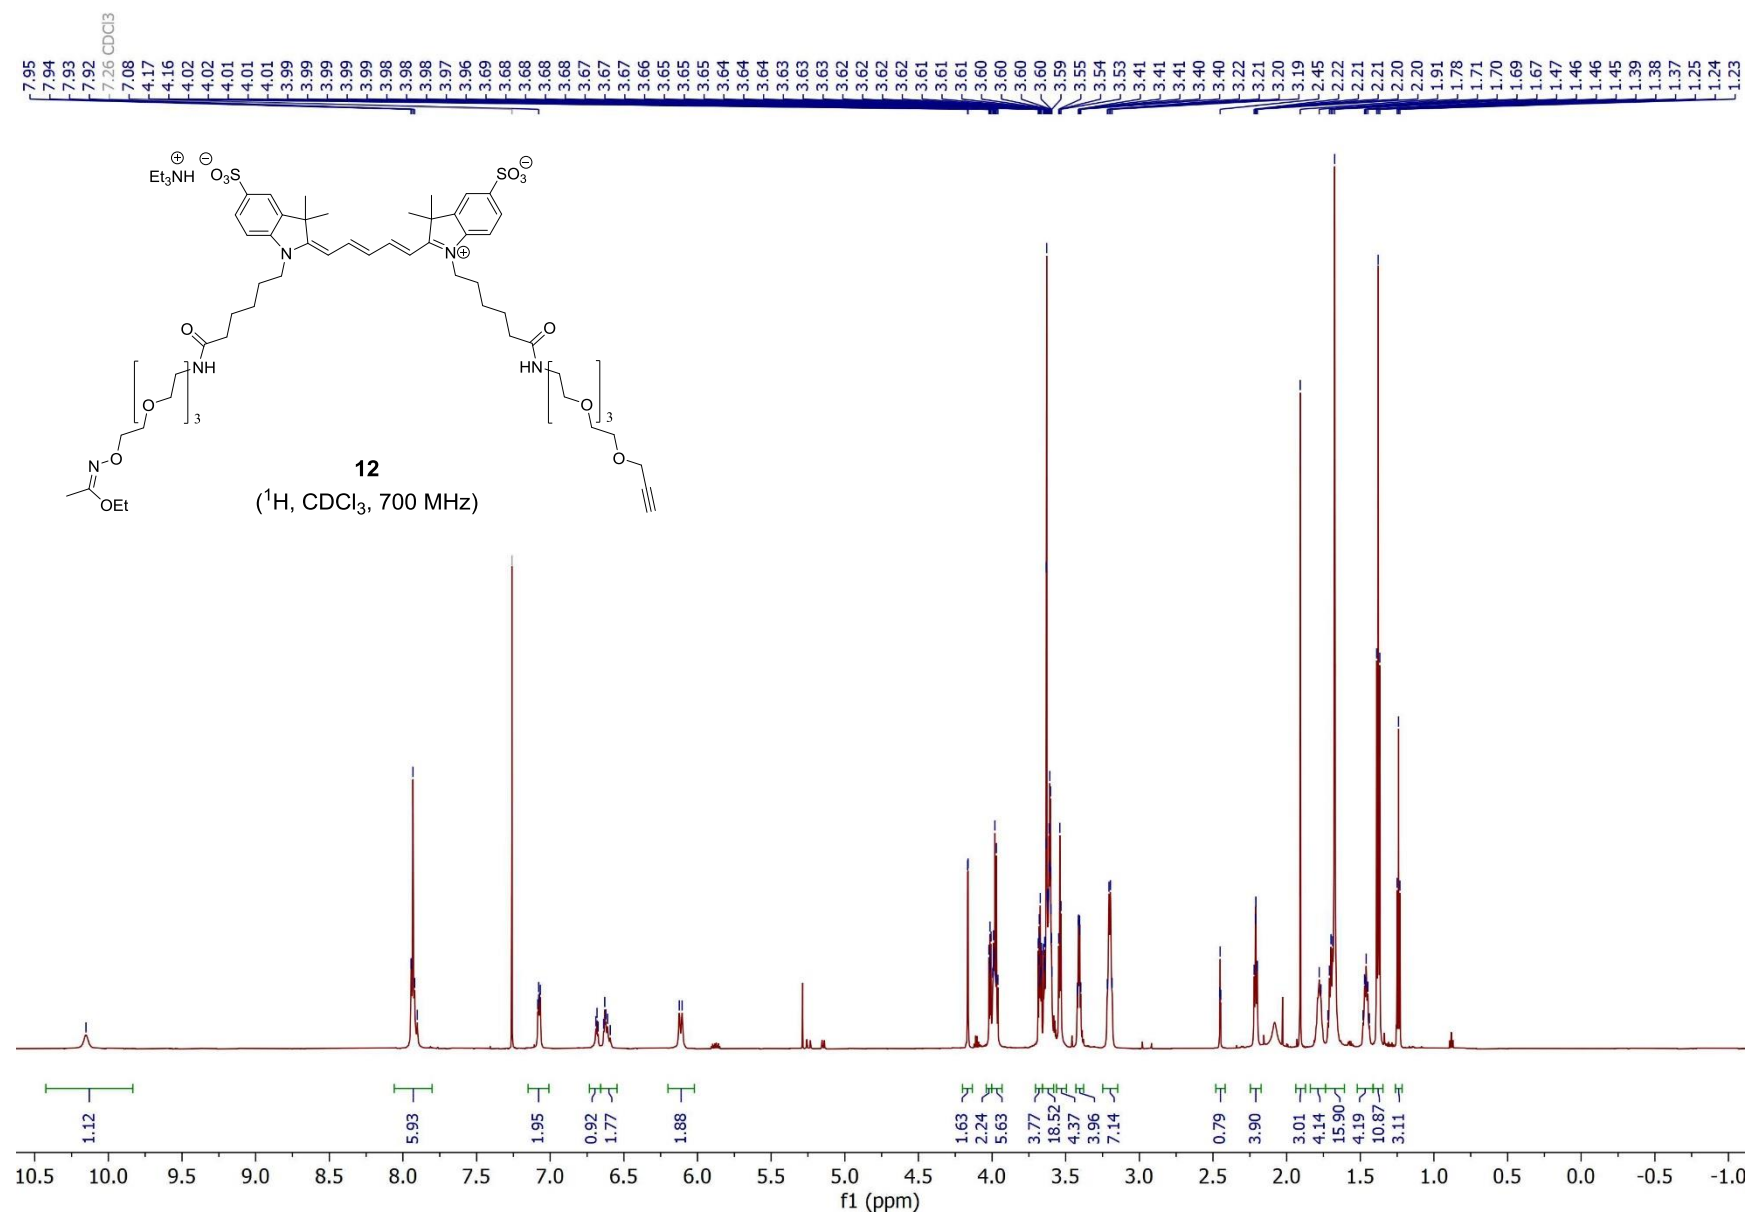

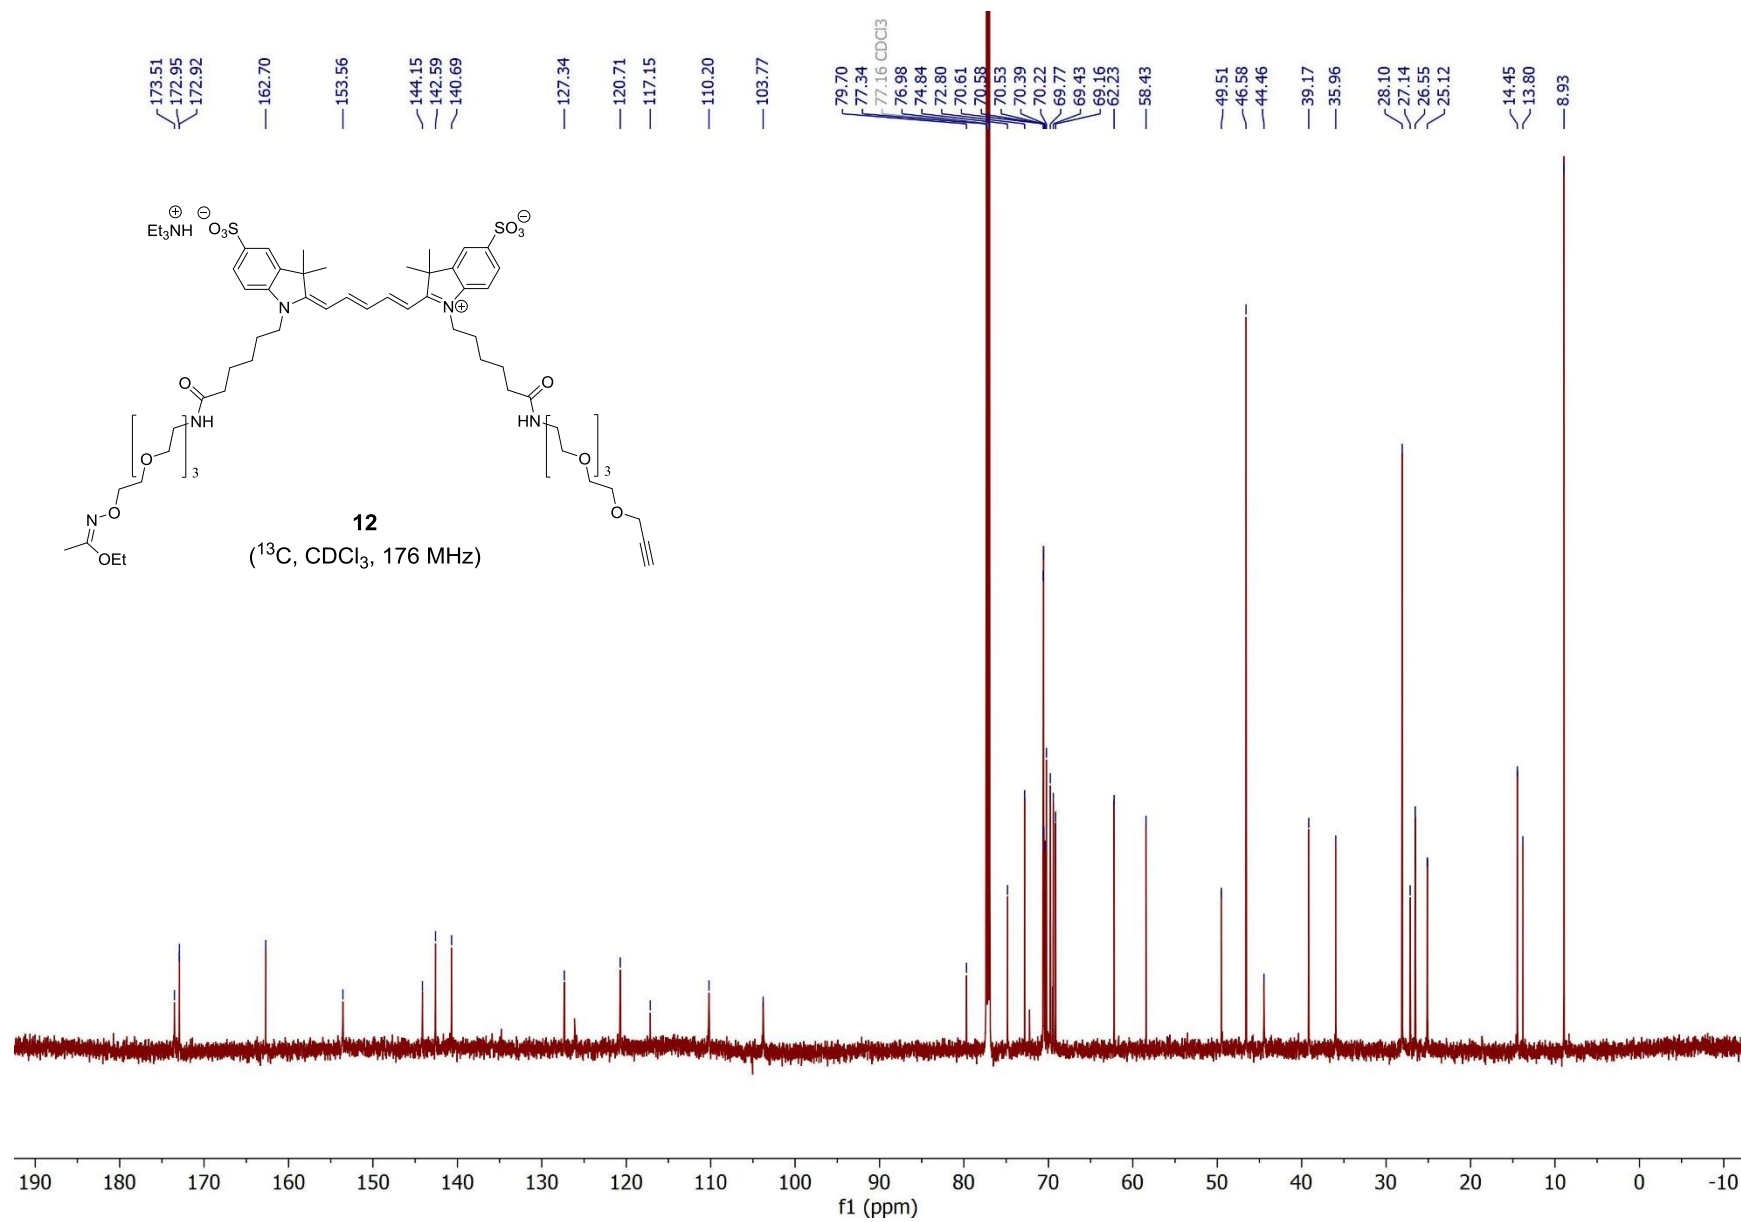

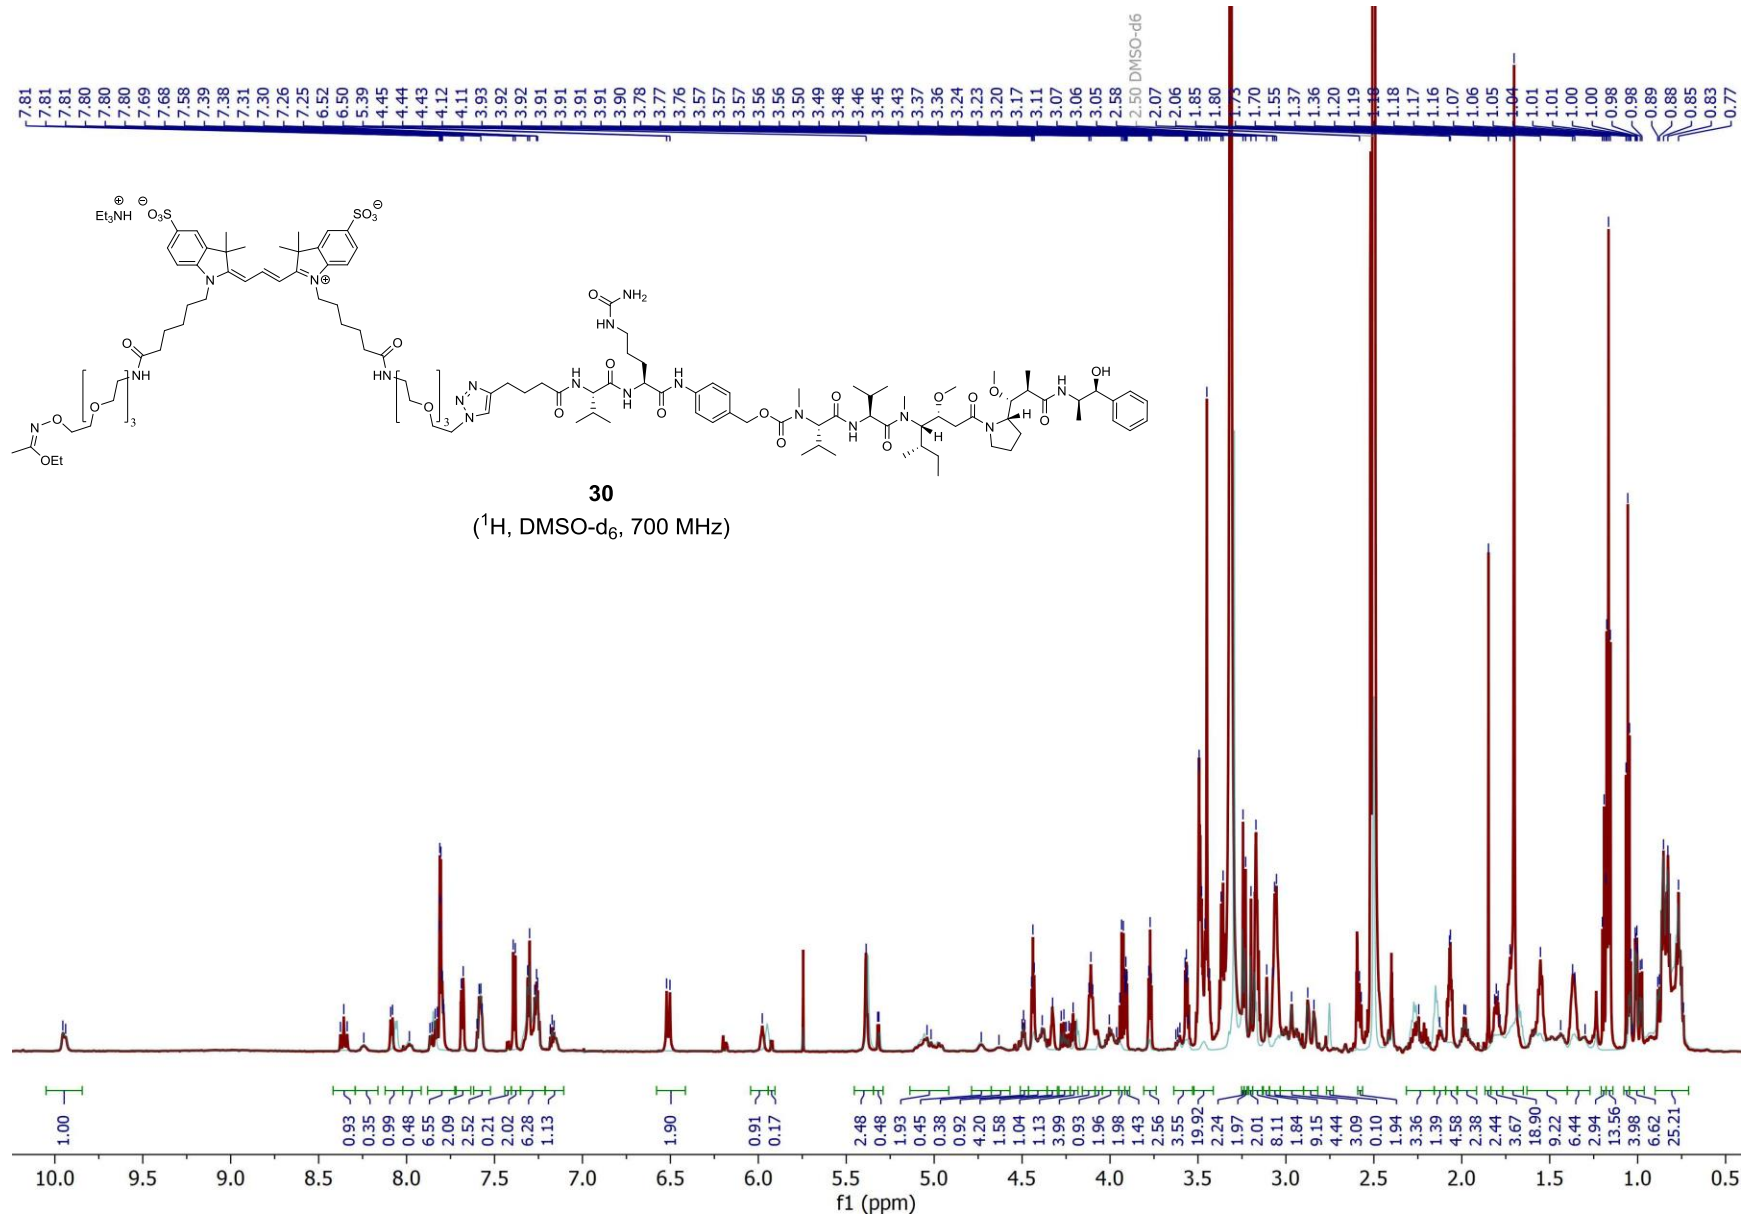



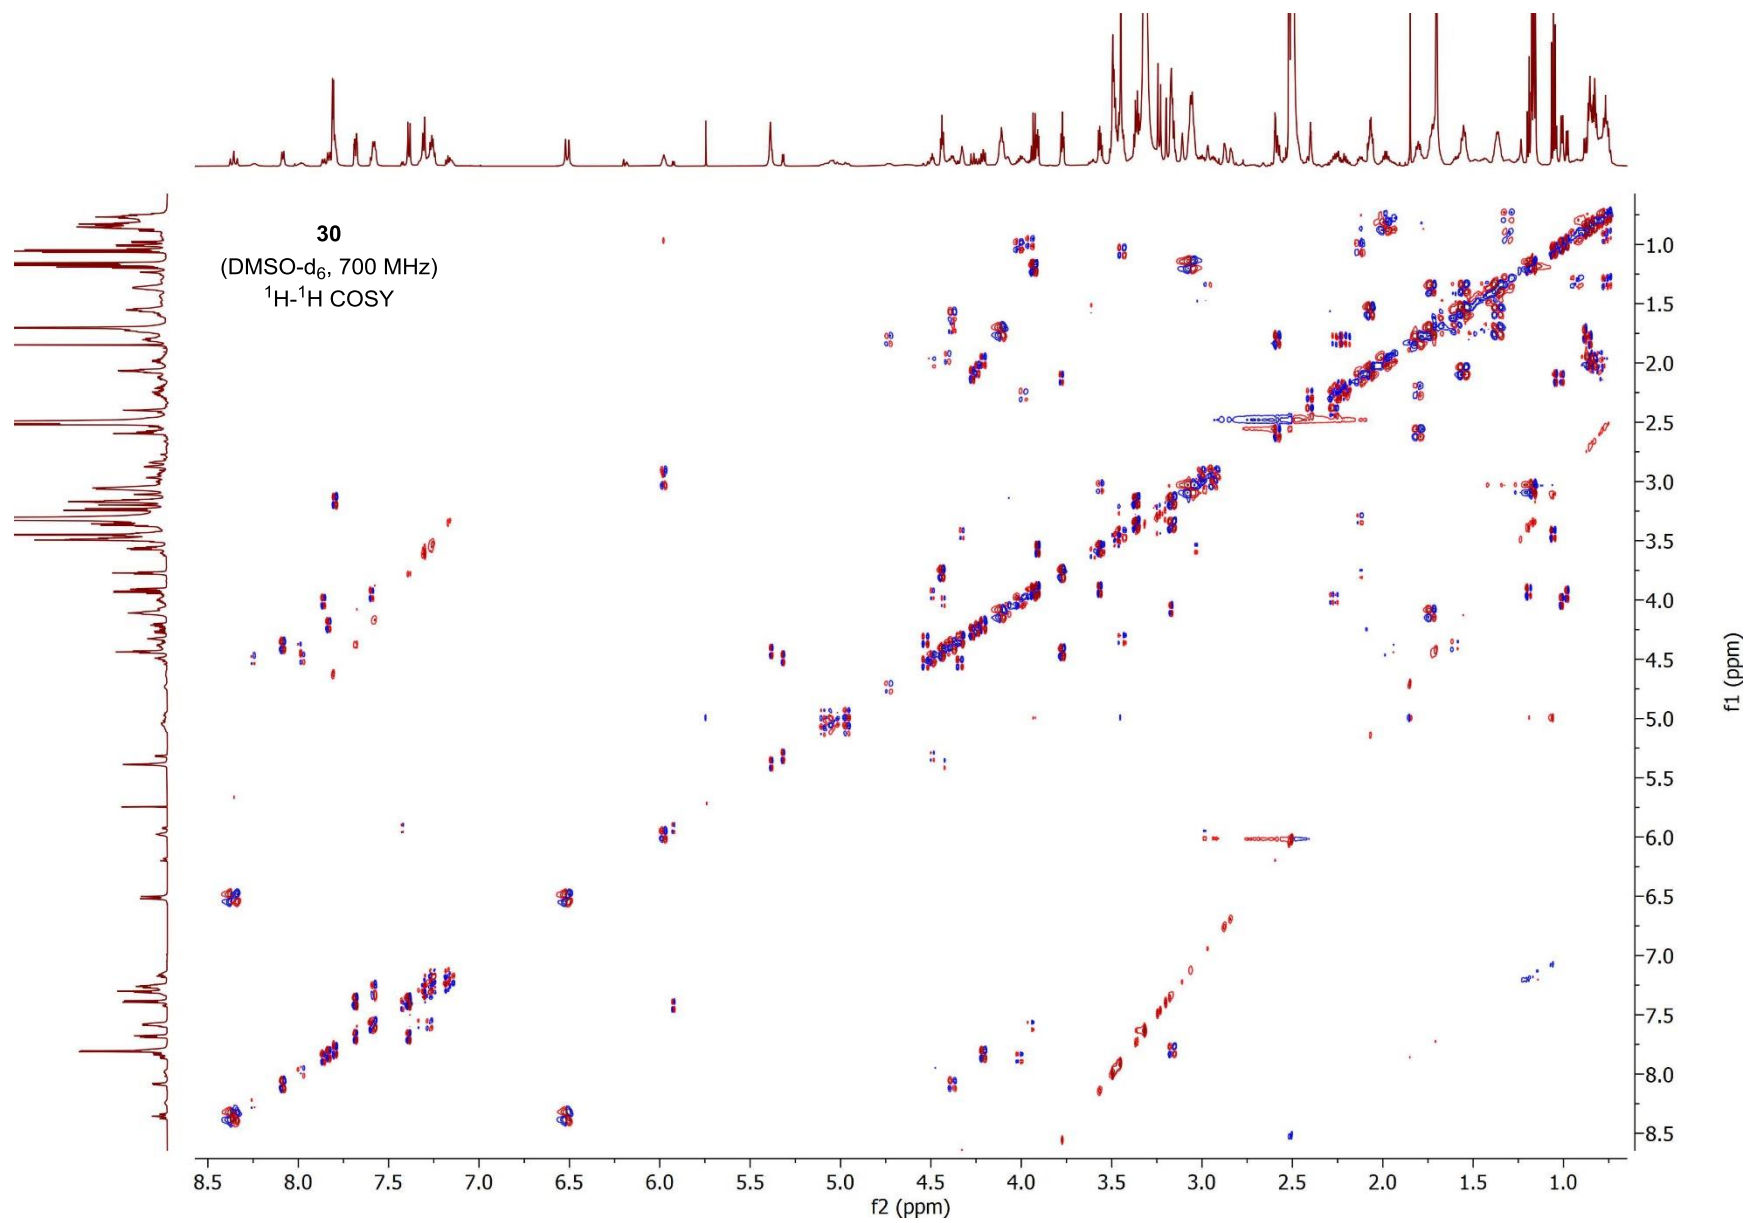

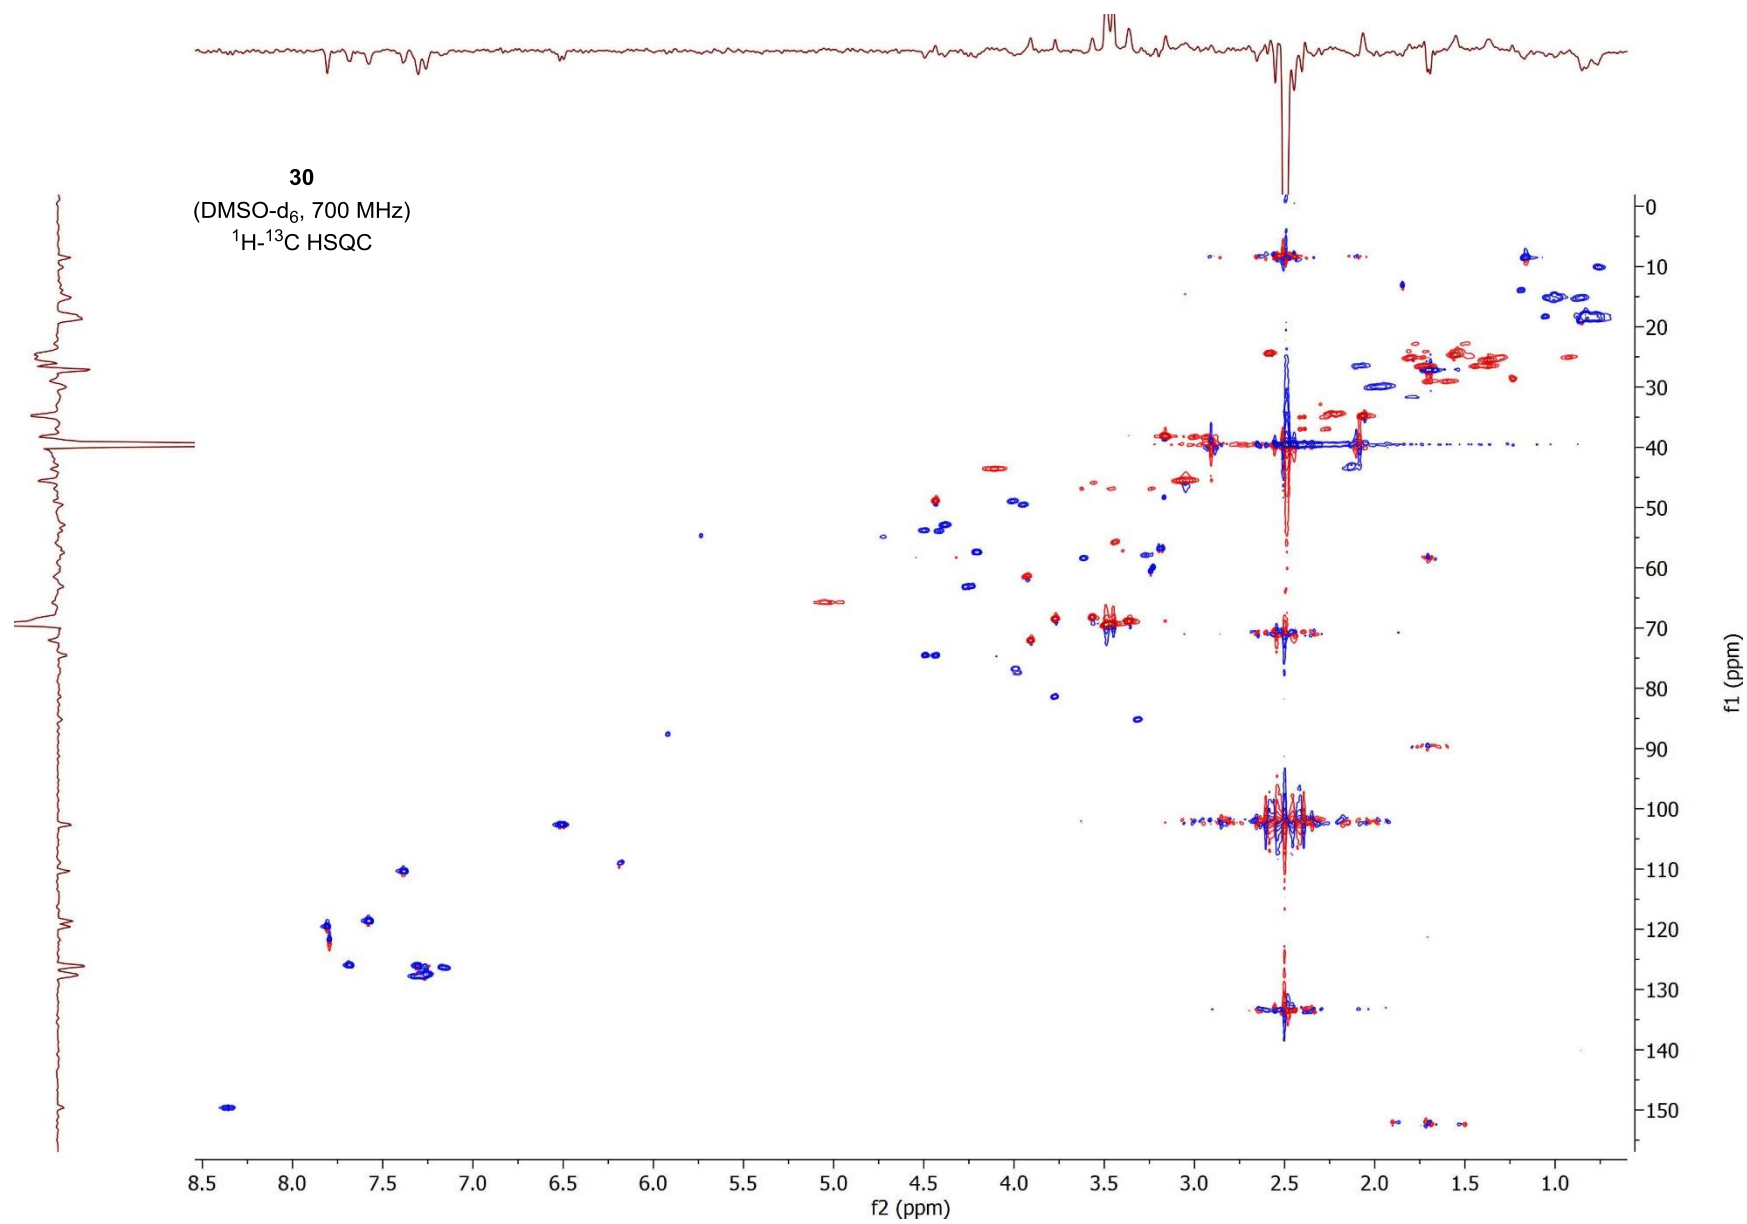

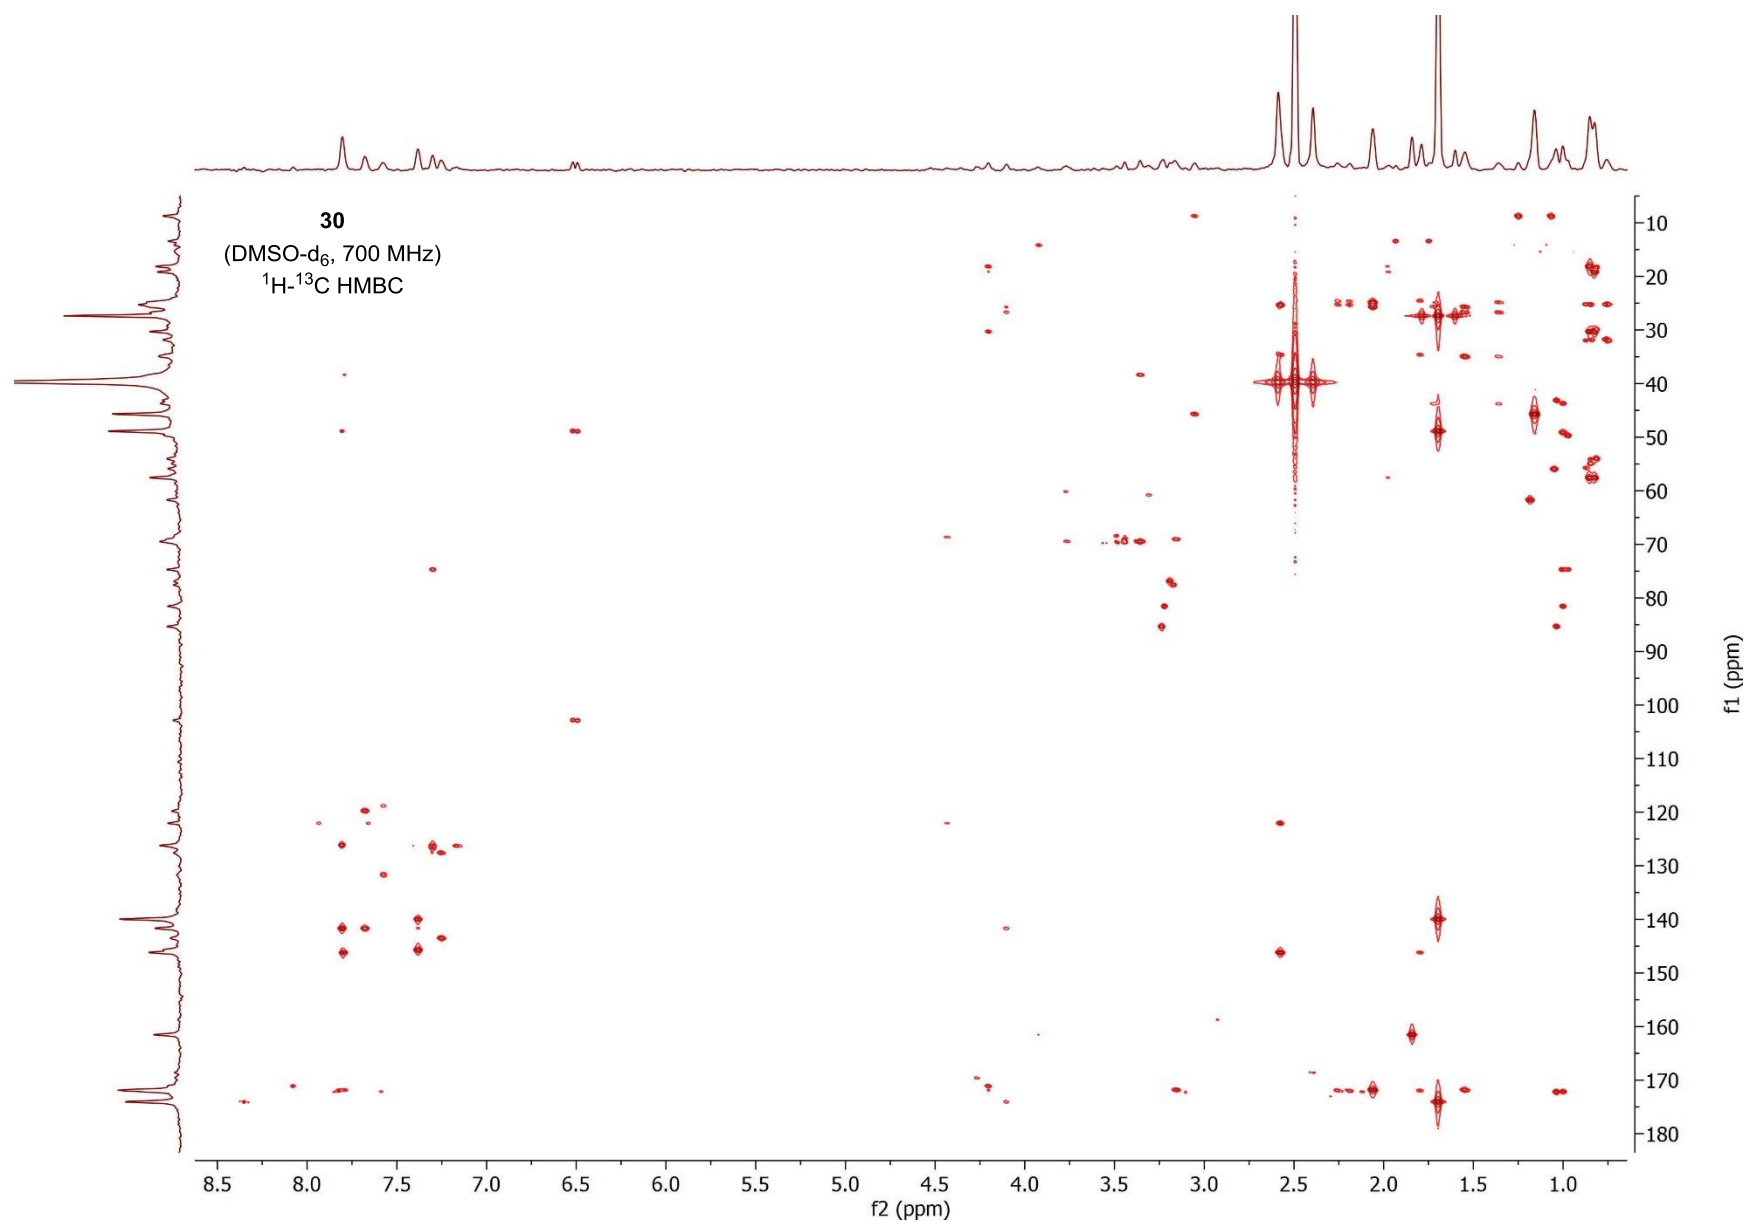

**HRMS for diazide 24, negative mode.**

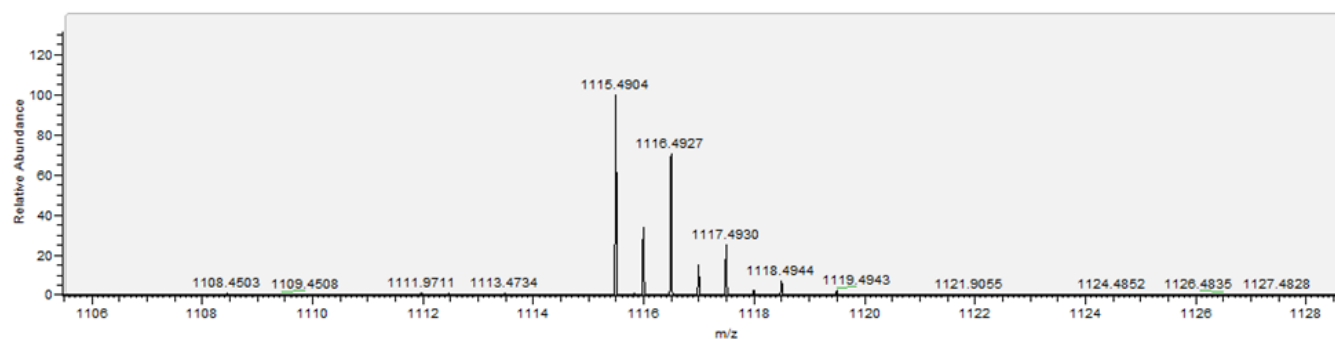

**HRMS for conjugate 6, positive mode.**

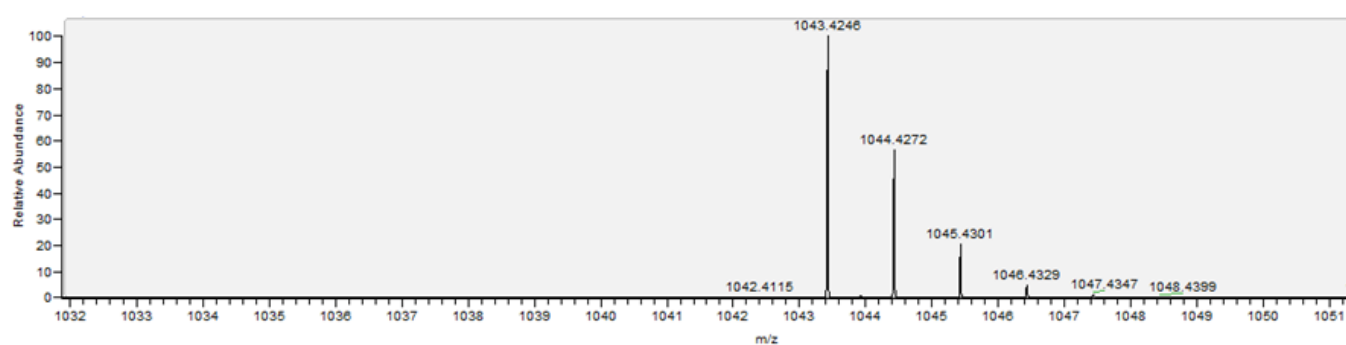

**HRMS for conjugate 2, negative mode.**

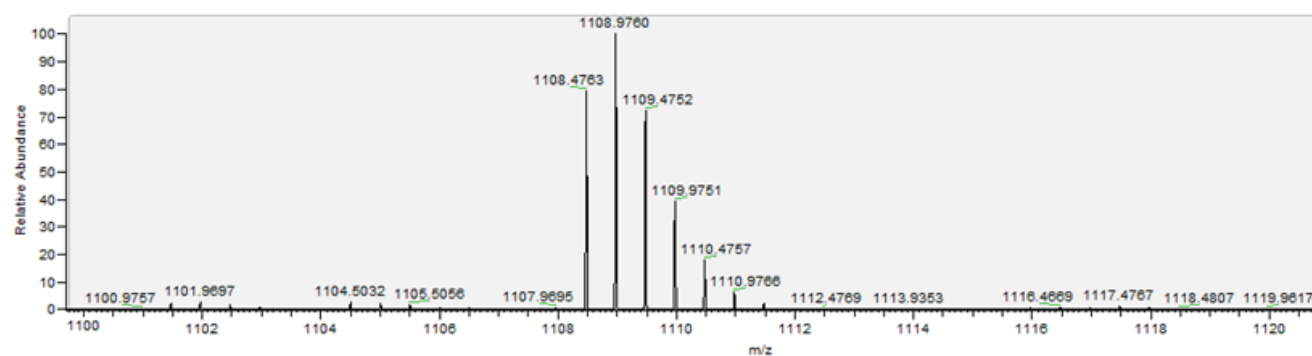

**HRMS for conjugate 10, negative mode.**

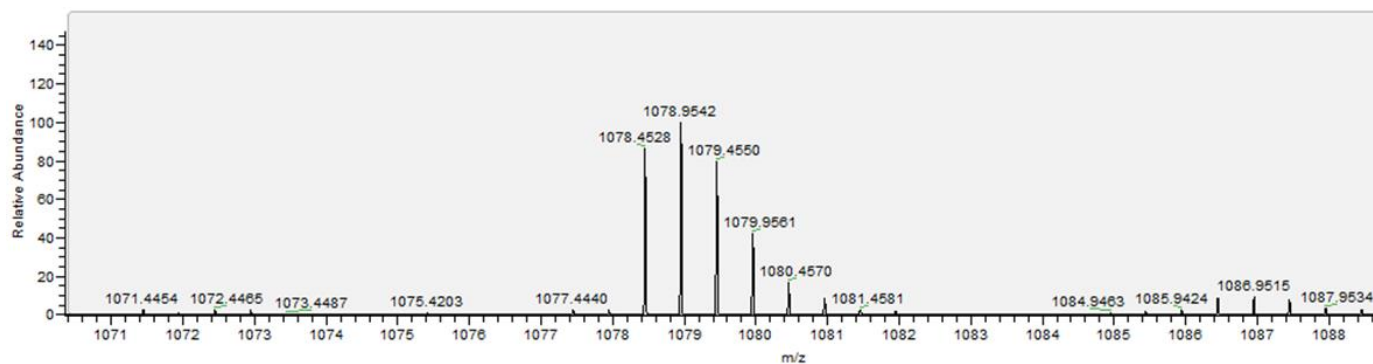

**HRMS for imidate 8, positive mode.**

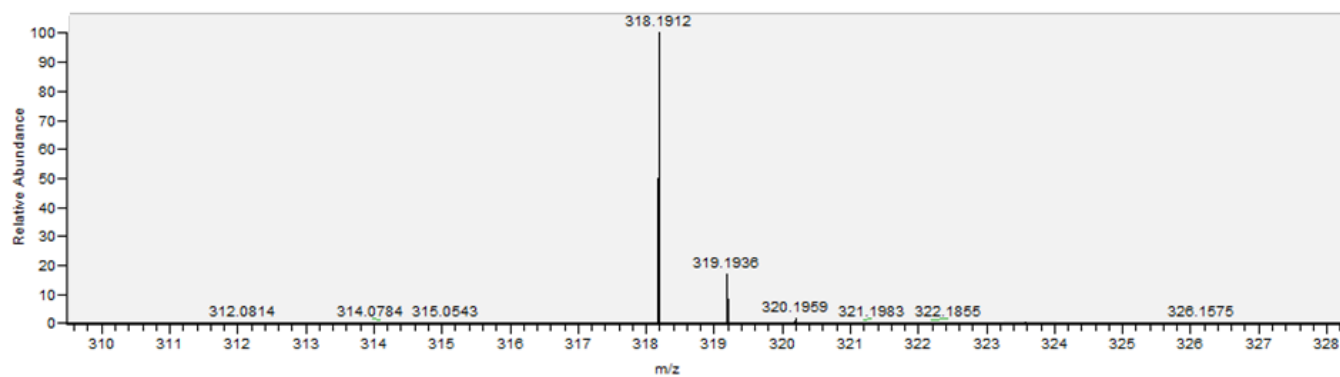

**HRMS for alkyne 27, negative mode.**

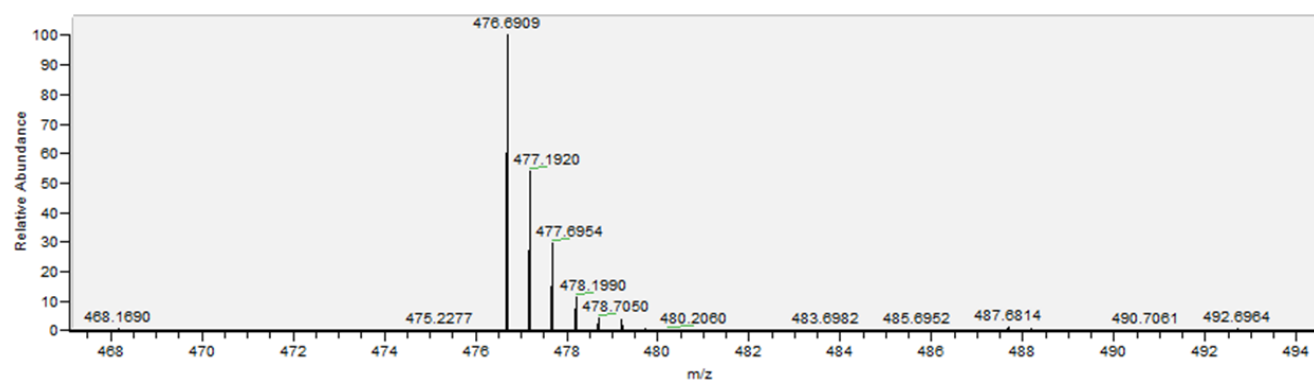

**HRMS for imidate 12, negative mode.**

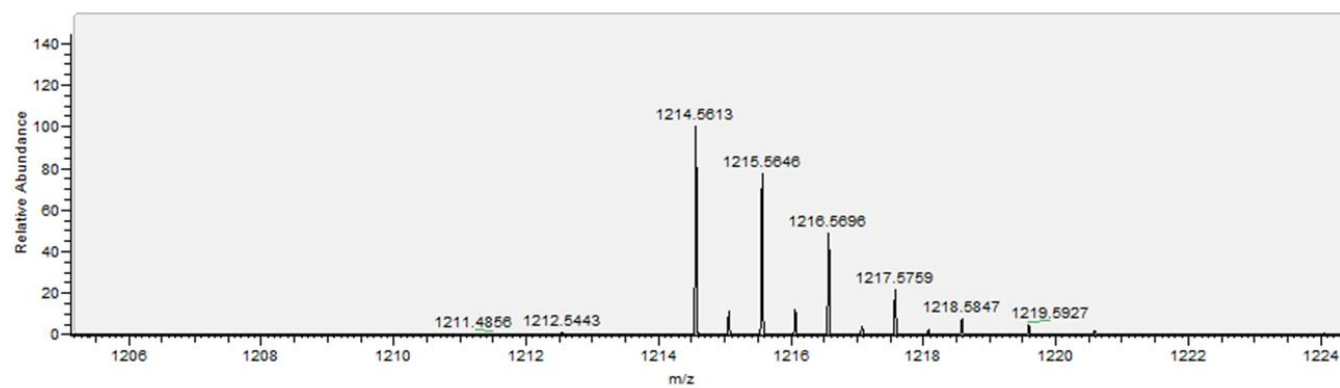

### HRMS for conjugate 30, positive mode.

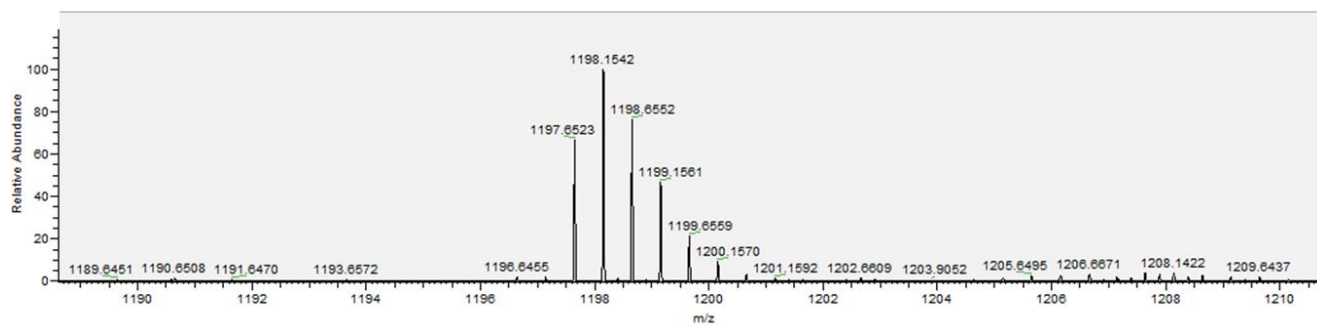

### HRMS for conjugate 31, positive mode.

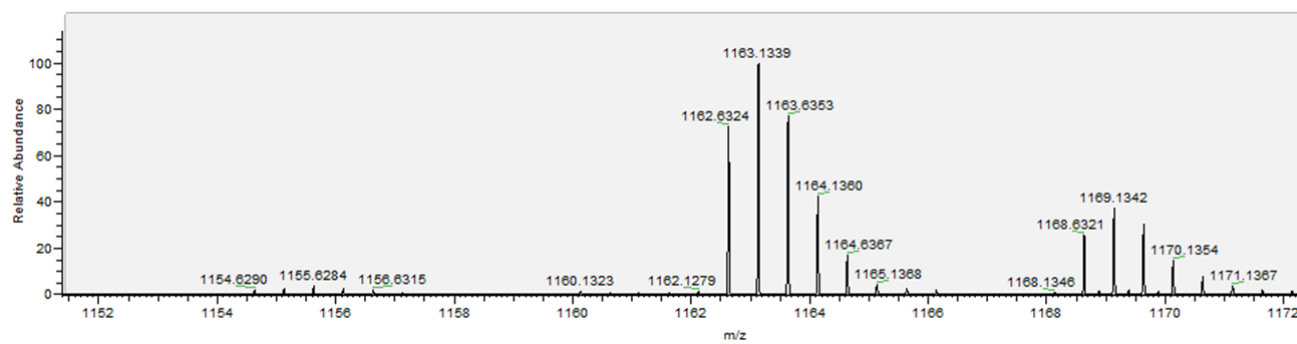

Supplement: s1 [file s1]
